# Supplementary material for: Comparative Transcriptomic Analysis Reveals the Functionally Segmented Intestine in Tunicate Ascidian
Source: Int J Mol Sci. 2023 Mar 27;24(7):6270. doi: 10.3390/ijms24076270 (PMC10094616; doi:10.3390/ijms24076270)
Supplement: Supplementary file 1 [file ijms-24-06270-s001.zip › Supplemental Table.xlsx]

## Sheet: Table S1
Quality summary of sequencing results
sample	library	raw_reads	raw_bases	clean_reads	clean_bases	error_rate	Q20	Q30	GC_pct
Cs_Proximal 1	Cs_Proximal 1	47234638	7.09G	45824888	6.87G	0.03	97.85	93.7	47.09
Cs_Middle1	Cs_Middle1	47886524	7.18G	45384900	6.81G	0.03	97.07	92.39	45.08
Cs_Distal1	Cs_Distal1	42771552	6.42G	41361702	6.2G	0.03	97.76	93.66	46.26
Cs_Proximal 2	Cs_Proximal 2	43245052	6.49G	42119952	6.32G	0.03	97.8	93.66	45.8
Cs_Middle2	Cs_Middle2	47879888	7.18G	46487574	6.97G	0.03	97.86	93.78	45.13
Cs_Distal2	Cs_Distal2	47258594	7.09G	43529002	6.53G	0.03	96.65	91.83	47.67
Cs_Proximal3	Cs_Proximal3	42351856	6.35G	41128904	6.17G	0.03	97.83	93.79	45.7
Cs_Middle3	Cs_Middle3	45739448	6.86G	44491818	6.67G	0.03	97.54	93	44.81
Cs_Distal3	Cs_Distal3	47826674	7.17G	46109576	6.92G	0.03	97.82	93.72	43.77

## Sheet: Table S2
Cluster0_GO enrich_significant
Category	GOID	Description	GeneRatio	BgRatio	pvalue	padj	geneID	geneName	Count
BP	GO:0006412	translation	56/513	128/3685	4.54635e-17	1.5594e-14	ENSCSAVG00000006343/ENSCSAVG00000010081/ENSCSAVG00000011609/ENSCSAVG00000010834/ENSCSAVG00000009726/ENSCSAVG00000008528/ENSCSAVG00000009906/ENSCSAVG00000006847/ENSCSAVG00000009697/ENSCSAVG00000000643/ENSCSAVG00000008472/ENSCSAVG00000007282/ENSCSAVG00000007330/ENSCSAVG00000001105/ENSCSAVG00000009125/ENSCSAVG00000003701/ENSCSAVG00000006147/novel.5094/ENSCSAVG00000002209/ENSCSAVG00000001293/ENSCSAVG…	-/-/-/-/-/-/-/-/-/-/-/-/-/-/-/-/-/-/-/-/-/-/-/-/-/-/-/-/-/-/-/-/-/-/-/-/-/-/-/-/-/-/-/-/-/-/-/-/-/-/-/-/-/-/-/-	56
BP	GO:0043043	peptide biosynthetic process	56/513	133/3685	3.77745e-16	4.49137e-14	ENSCSAVG00000006343/ENSCSAVG00000010081/ENSCSAVG00000011609/ENSCSAVG00000010834/ENSCSAVG00000009726/ENSCSAVG00000008528/ENSCSAVG00000009906/ENSCSAVG00000006847/ENSCSAVG00000009697/ENSCSAVG00000000643/ENSCSAVG00000008472/ENSCSAVG00000007282/ENSCSAVG00000007330/ENSCSAVG00000001105/ENSCSAVG00000009125/ENSCSAVG00000003701/ENSCSAVG00000006147/novel.5094/ENSCSAVG00000002209/ENSCSAVG00000001293/ENSCSAVG…	-/-/-/-/-/-/-/-/-/-/-/-/-/-/-/-/-/-/-/-/-/-/-/-/-/-/-/-/-/-/-/-/-/-/-/-/-/-/-/-/-/-/-/-/-/-/-/-/-/-/-/-/-/-/-/-	56
BP	GO:0043604	amide biosynthetic process	58/513	141/3685	3.92831e-16	4.49137e-14	ENSCSAVG00000006343/ENSCSAVG00000010081/ENSCSAVG00000011609/ENSCSAVG00000010834/ENSCSAVG00000009726/ENSCSAVG00000008528/ENSCSAVG00000009906/ENSCSAVG00000006847/ENSCSAVG00000009697/ENSCSAVG00000000643/ENSCSAVG00000008472/ENSCSAVG00000007282/ENSCSAVG00000007330/ENSCSAVG00000001105/ENSCSAVG00000009125/ENSCSAVG00000003701/ENSCSAVG00000006147/novel.5094/ENSCSAVG00000002209/ENSCSAVG00000001293/ENSCSAVG…	-/-/-/-/-/-/-/-/-/-/-/-/-/-/-/-/-/-/-/-/-/-/-/-/-/-/-/-/-/-/-/-/-/-/-/-/-/-/-/-/-/-/-/-/-/-/-/-/-/-/-/-/-/-/-/-/-/-	58
BP	GO:0006518	peptide metabolic process	58/513	146/3685	2.64314e-15	2.2665e-13	ENSCSAVG00000006343/ENSCSAVG00000010081/ENSCSAVG00000011609/ENSCSAVG00000010834/ENSCSAVG00000009726/ENSCSAVG00000008528/ENSCSAVG00000009906/ENSCSAVG00000006847/ENSCSAVG00000009697/ENSCSAVG00000000643/ENSCSAVG00000008472/ENSCSAVG00000007282/ENSCSAVG00000007330/ENSCSAVG00000001105/ENSCSAVG00000009125/ENSCSAVG00000003701/ENSCSAVG00000006147/novel.5094/ENSCSAVG00000002209/ENSCSAVG00000001293/ENSCSAVG…	-/-/-/-/-/-/-/-/-/-/-/-/-/-/-/-/-/-/-/-/-/-/-/-/-/-/-/-/-/-/-/-/-/-/-/-/-/-/-/-/-/-/-/-/-/-/-/-/-/-/-/-/-/-/-/-/-/-	58
BP	GO:0043603	cellular amide metabolic process	60/513	159/3685	1.39017e-14	9.53659e-13	ENSCSAVG00000006343/ENSCSAVG00000010081/ENSCSAVG00000011609/ENSCSAVG00000010834/ENSCSAVG00000009726/ENSCSAVG00000008528/ENSCSAVG00000009906/ENSCSAVG00000006847/ENSCSAVG00000009697/ENSCSAVG00000000643/ENSCSAVG00000008472/ENSCSAVG00000007282/ENSCSAVG00000007330/ENSCSAVG00000001105/ENSCSAVG00000009125/ENSCSAVG00000003701/ENSCSAVG00000006147/novel.5094/ENSCSAVG00000002209/ENSCSAVG00000001293/ENSCSAVG…	-/-/-/-/-/-/-/-/-/-/-/-/-/-/-/-/-/-/-/-/-/-/-/-/-/-/-/-/-/-/-/-/-/-/-/-/-/-/-/-/-/-/-/-/-/-/-/-/-/-/-/-/-/-/-/-/-/-/-/-	60
BP	GO:0044271	cellular nitrogen compound biosynthetic process	120/513	479/3685	1.6295e-12	9.3153e-11	ENSCSAVG00000006343/ENSCSAVG00000010081/ENSCSAVG00000011609/ENSCSAVG00000010834/ENSCSAVG00000009726/ENSCSAVG00000008528/ENSCSAVG00000009906/ENSCSAVG00000006847/ENSCSAVG00000009697/ENSCSAVG00000000643/ENSCSAVG00000008472/ENSCSAVG00000007282/ENSCSAVG00000007330/ENSCSAVG00000001105/ENSCSAVG00000009125/ENSCSAVG00000003701/ENSCSAVG00000006147/novel.5094/ENSCSAVG00000003053/ENSCSAVG00000010715/ENSCSAVG…	-/-/-/-/-/-/-/-/-/-/-/-/-/-/-/-/-/-/-/-/-/-/-/-/-/-/-/-/-/-/-/-/-/-/-/-/-/-/-/-/-/-/-/-/-/-/-/-/-/-/-/-/-/-/-/-/-/-/-/-/-/-/-/-/-/-/-/-/-/-/-/-/-/-/-/-/-/-/-/-/-/-/-/-/-/-/-/-/-/-/-/-/-/-/-/-/-/-/-/-/-/-/-/-/-/-/-/-/-/-/-/-/-/-/-/-/-/-/-/-	120
BP	GO:0010467	gene expression	118/513	484/3685	1.97935e-11	9.69883e-10	ENSCSAVG00000006343/ENSCSAVG00000010081/ENSCSAVG00000011609/ENSCSAVG00000010834/ENSCSAVG00000009726/ENSCSAVG00000008528/ENSCSAVG00000009906/ENSCSAVG00000006847/ENSCSAVG00000009697/ENSCSAVG00000000643/ENSCSAVG00000008472/ENSCSAVG00000007282/ENSCSAVG00000007330/ENSCSAVG00000001105/ENSCSAVG00000009125/ENSCSAVG00000003701/ENSCSAVG00000006147/novel.5094/ENSCSAVG00000003053/ENSCSAVG00000002209/ENSCSAVG…	-/-/-/-/-/-/-/-/-/-/-/-/-/-/-/-/-/-/-/-/-/-/-/-/-/-/-/-/-/-/-/-/-/-/-/-/-/-/-/-/-/-/-/-/-/-/-/-/-/-/-/-/-/-/-/-/-/-/-/-/-/-/-/-/-/-/-/-/-/-/-/-/-/-/-/-/-/-/-/-/-/-/-/-/-/-/-/-/-/-/-/-/-/-/-/-/-/-/-/-/-/-/-/-/-/-/-/-/-/-/-/-/-/-/-/-/-/-	118
BP	GO:1901566	organonitrogen compound biosynthetic process	87/513	322/3685	5.66799e-11	2.43015e-09	ENSCSAVG00000006343/ENSCSAVG00000010081/ENSCSAVG00000011609/ENSCSAVG00000010834/ENSCSAVG00000009726/ENSCSAVG00000008528/ENSCSAVG00000009906/ENSCSAVG00000006847/ENSCSAVG00000009697/ENSCSAVG00000000643/ENSCSAVG00000008472/ENSCSAVG00000007282/ENSCSAVG00000007330/ENSCSAVG00000001105/ENSCSAVG00000009125/ENSCSAVG00000003701/ENSCSAVG00000006147/novel.5094/ENSCSAVG00000010715/ENSCSAVG00000002209/ENSCSAVG…	-/-/-/-/-/-/-/-/-/-/-/-/-/-/-/-/-/-/-/-/-/-/-/-/-/-/-/-/-/-/-/-/-/-/-/-/-/-/-/-/-/-/-/-/-/-/-/-/-/-/-/-/-/-/-/-/-/-/-/-/-/-/-/-/-/-/-/-/-/-/-/-/-/-/-/-/-/-/-/-/-/-/-/-/-/-/-	87
BP	GO:1901575	organic substance catabolic process	31/513	67/3685	1.10135e-10	4.19738e-09	ENSCSAVG00000010715/ENSCSAVG00000001409/ENSCSAVG00000006248/ENSCSAVG00000005078/ENSCSAVG00000010872/ENSCSAVG00000007029/ENSCSAVG00000001392/ENSCSAVG00000011135/ENSCSAVG00000003542/ENSCSAVG00000000720/ENSCSAVG00000003598/ENSCSAVG00000010386/ENSCSAVG00000008740/ENSCSAVG00000010631/ENSCSAVG00000010244/ENSCSAVG00000009761/ENSCSAVG00000004264/ENSCSAVG00000005269/ENSCSAVG00000008344/novel.2645/ENSCSAVG…	-/-/-/-/-/-/-/-/-/-/-/-/-/-/-/-/-/-/-/-/-/-/-/-/-/-/-/-/-/-/-	31
BP	GO:0009123	nucleoside monophosphate metabolic process	17/513	24/3685	2.92636e-10	1.00374e-08	ENSCSAVG00000011741/ENSCSAVG00000010715/ENSCSAVG00000003350/ENSCSAVG00000009414/ENSCSAVG00000007278/ENSCSAVG00000000185/ENSCSAVG00000009170/ENSCSAVG00000001409/ENSCSAVG00000001223/novel.3395/ENSCSAVG00000010951/ENSCSAVG00000010872/ENSCSAVG00000005243/ENSCSAVG00000008344/ENSCSAVG00000010017/ENSCSAVG00000003815/ENSCSAVG00000005799	-/-/-/-/-/-/-/-/-/-/-/-/-/-/-/-/-	17
BP	GO:0009056	catabolic process	31/513	72/3685	1.03531e-09	3.2283e-08	ENSCSAVG00000010715/ENSCSAVG00000001409/ENSCSAVG00000006248/ENSCSAVG00000005078/ENSCSAVG00000010872/ENSCSAVG00000007029/ENSCSAVG00000001392/ENSCSAVG00000011135/ENSCSAVG00000003542/ENSCSAVG00000000720/ENSCSAVG00000003598/ENSCSAVG00000010386/ENSCSAVG00000008740/ENSCSAVG00000010631/ENSCSAVG00000010244/ENSCSAVG00000009761/ENSCSAVG00000004264/ENSCSAVG00000005269/ENSCSAVG00000008344/novel.2645/ENSCSAVG…	-/-/-/-/-/-/-/-/-/-/-/-/-/-/-/-/-/-/-/-/-/-/-/-/-/-/-/-/-/-/-	31
BP	GO:0009142	nucleoside triphosphate biosynthetic process	14/513	18/3685	1.56576e-09	3.58038e-08	ENSCSAVG00000010715/ENSCSAVG00000009414/ENSCSAVG00000007278/ENSCSAVG00000000185/ENSCSAVG00000009170/ENSCSAVG00000001409/novel.3395/ENSCSAVG00000010951/ENSCSAVG00000010872/ENSCSAVG00000011754/ENSCSAVG00000006332/ENSCSAVG00000008344/ENSCSAVG00000009194/ENSCSAVG00000003815	-/-/-/-/-/-/-/-/-/-/-/-/-/-	14
BP	GO:0009145	purine nucleoside triphosphate biosynthetic process	14/513	18/3685	1.56576e-09	3.58038e-08	ENSCSAVG00000010715/ENSCSAVG00000009414/ENSCSAVG00000007278/ENSCSAVG00000000185/ENSCSAVG00000009170/ENSCSAVG00000001409/novel.3395/ENSCSAVG00000010951/ENSCSAVG00000010872/ENSCSAVG00000011754/ENSCSAVG00000006332/ENSCSAVG00000008344/ENSCSAVG00000009194/ENSCSAVG00000003815	-/-/-/-/-/-/-/-/-/-/-/-/-/-	14
BP	GO:0009201	ribonucleoside triphosphate biosynthetic process	14/513	18/3685	1.56576e-09	3.58038e-08	ENSCSAVG00000010715/ENSCSAVG00000009414/ENSCSAVG00000007278/ENSCSAVG00000000185/ENSCSAVG00000009170/ENSCSAVG00000001409/novel.3395/ENSCSAVG00000010951/ENSCSAVG00000010872/ENSCSAVG00000011754/ENSCSAVG00000006332/ENSCSAVG00000008344/ENSCSAVG00000009194/ENSCSAVG00000003815	-/-/-/-/-/-/-/-/-/-/-/-/-/-	14
BP	GO:0009206	purine ribonucleoside triphosphate biosynthetic process	14/513	18/3685	1.56576e-09	3.58038e-08	ENSCSAVG00000010715/ENSCSAVG00000009414/ENSCSAVG00000007278/ENSCSAVG00000000185/ENSCSAVG00000009170/ENSCSAVG00000001409/novel.3395/ENSCSAVG00000010951/ENSCSAVG00000010872/ENSCSAVG00000011754/ENSCSAVG00000006332/ENSCSAVG00000008344/ENSCSAVG00000009194/ENSCSAVG00000003815	-/-/-/-/-/-/-/-/-/-/-/-/-/-	14
BP	GO:0009144	purine nucleoside triphosphate metabolic process	17/513	27/3685	4.73798e-09	9.02848e-08	ENSCSAVG00000011741/ENSCSAVG00000010715/ENSCSAVG00000003350/ENSCSAVG00000009414/ENSCSAVG00000007278/ENSCSAVG00000000185/ENSCSAVG00000009170/ENSCSAVG00000001409/ENSCSAVG00000001223/novel.3395/ENSCSAVG00000010951/ENSCSAVG00000010872/ENSCSAVG00000011754/ENSCSAVG00000006332/ENSCSAVG00000008344/ENSCSAVG00000009194/ENSCSAVG00000003815	-/-/-/-/-/-/-/-/-/-/-/-/-/-/-/-/-	17
BP	GO:0009199	ribonucleoside triphosphate metabolic process	17/513	27/3685	4.73798e-09	9.02848e-08	ENSCSAVG00000011741/ENSCSAVG00000010715/ENSCSAVG00000003350/ENSCSAVG00000009414/ENSCSAVG00000007278/ENSCSAVG00000000185/ENSCSAVG00000009170/ENSCSAVG00000001409/ENSCSAVG00000001223/novel.3395/ENSCSAVG00000010951/ENSCSAVG00000010872/ENSCSAVG00000011754/ENSCSAVG00000006332/ENSCSAVG00000008344/ENSCSAVG00000009194/ENSCSAVG00000003815	-/-/-/-/-/-/-/-/-/-/-/-/-/-/-/-/-	17
BP	GO:0009205	purine ribonucleoside triphosphate metabolic process	17/513	27/3685	4.73798e-09	9.02848e-08	ENSCSAVG00000011741/ENSCSAVG00000010715/ENSCSAVG00000003350/ENSCSAVG00000009414/ENSCSAVG00000007278/ENSCSAVG00000000185/ENSCSAVG00000009170/ENSCSAVG00000001409/ENSCSAVG00000001223/novel.3395/ENSCSAVG00000010951/ENSCSAVG00000010872/ENSCSAVG00000011754/ENSCSAVG00000006332/ENSCSAVG00000008344/ENSCSAVG00000009194/ENSCSAVG00000003815	-/-/-/-/-/-/-/-/-/-/-/-/-/-/-/-/-	17
BP	GO:0009126	purine nucleoside monophosphate metabolic process	15/513	22/3685	7.87922e-09	1.28694e-07	ENSCSAVG00000011741/ENSCSAVG00000010715/ENSCSAVG00000003350/ENSCSAVG00000009414/ENSCSAVG00000007278/ENSCSAVG00000000185/ENSCSAVG00000009170/ENSCSAVG00000001409/ENSCSAVG00000001223/novel.3395/ENSCSAVG00000010951/ENSCSAVG00000010872/ENSCSAVG00000008344/ENSCSAVG00000003815/ENSCSAVG00000005799	-/-/-/-/-/-/-/-/-/-/-/-/-/-/-	15
BP	GO:0009161	ribonucleoside monophosphate metabolic process	15/513	22/3685	7.87922e-09	1.28694e-07	ENSCSAVG00000011741/ENSCSAVG00000010715/ENSCSAVG00000003350/ENSCSAVG00000009414/ENSCSAVG00000007278/ENSCSAVG00000000185/ENSCSAVG00000009170/ENSCSAVG00000001409/ENSCSAVG00000001223/novel.3395/ENSCSAVG00000010951/ENSCSAVG00000010872/ENSCSAVG00000008344/ENSCSAVG00000003815/ENSCSAVG00000005799	-/-/-/-/-/-/-/-/-/-/-/-/-/-/-	15
BP	GO:0009167	purine ribonucleoside monophosphate metabolic process	15/513	22/3685	7.87922e-09	1.28694e-07	ENSCSAVG00000011741/ENSCSAVG00000010715/ENSCSAVG00000003350/ENSCSAVG00000009414/ENSCSAVG00000007278/ENSCSAVG00000000185/ENSCSAVG00000009170/ENSCSAVG00000001409/ENSCSAVG00000001223/novel.3395/ENSCSAVG00000010951/ENSCSAVG00000010872/ENSCSAVG00000008344/ENSCSAVG00000003815/ENSCSAVG00000005799	-/-/-/-/-/-/-/-/-/-/-/-/-/-/-	15
BP	GO:0009124	nucleoside monophosphate biosynthetic process	13/513	17/3685	8.96196e-09	1.39725e-07	ENSCSAVG00000010715/ENSCSAVG00000009414/ENSCSAVG00000007278/ENSCSAVG00000000185/ENSCSAVG00000009170/ENSCSAVG00000001409/novel.3395/ENSCSAVG00000010951/ENSCSAVG00000010872/ENSCSAVG00000005243/ENSCSAVG00000008344/ENSCSAVG00000003815/ENSCSAVG00000005799	-/-/-/-/-/-/-/-/-/-/-/-/-	13
BP	GO:0044248	cellular catabolic process	28/513	66/3685	1.02528e-08	1.48281e-07	ENSCSAVG00000010715/ENSCSAVG00000001409/ENSCSAVG00000006248/ENSCSAVG00000005078/ENSCSAVG00000010872/ENSCSAVG00000007029/ENSCSAVG00000001392/ENSCSAVG00000011135/ENSCSAVG00000003542/ENSCSAVG00000000720/ENSCSAVG00000003598/ENSCSAVG00000010386/ENSCSAVG00000008740/ENSCSAVG00000010631/ENSCSAVG00000010244/ENSCSAVG00000009761/ENSCSAVG00000005269/ENSCSAVG00000008344/ENSCSAVG00000005488/novel.2918/ENSCSAVG…	-/-/-/-/-/-/-/-/-/-/-/-/-/-/-/-/-/-/-/-/-/-/-/-/-/-/-/-	28
BP	GO:0030163	protein catabolic process	18/513	31/3685	1.03754e-08	1.48281e-07	ENSCSAVG00000006248/ENSCSAVG00000005078/ENSCSAVG00000007029/ENSCSAVG00000001392/ENSCSAVG00000011135/ENSCSAVG00000003542/ENSCSAVG00000000720/ENSCSAVG00000010386/ENSCSAVG00000008740/ENSCSAVG00000010631/ENSCSAVG00000009761/ENSCSAVG00000005269/ENSCSAVG00000009758/ENSCSAVG00000005488/novel.2918/ENSCSAVG00000010007/ENSCSAVG00000000219/ENSCSAVG00000010026	-/-/-/-/-/-/-/-/-/-/-/-/-/-/-/-/-/-	18
BP	GO:0046034	ATP metabolic process	14/513	20/3685	1.51281e-08	2.07557e-07	ENSCSAVG00000011741/ENSCSAVG00000010715/ENSCSAVG00000003350/ENSCSAVG00000009414/ENSCSAVG00000007278/ENSCSAVG00000000185/ENSCSAVG00000009170/ENSCSAVG00000001409/ENSCSAVG00000001223/novel.3395/ENSCSAVG00000010951/ENSCSAVG00000010872/ENSCSAVG00000008344/ENSCSAVG00000003815	-/-/-/-/-/-/-/-/-/-/-/-/-/-	14
BP	GO:0009141	nucleoside triphosphate metabolic process	17/513	29/3685	2.21924e-08	2.71857e-07	ENSCSAVG00000011741/ENSCSAVG00000010715/ENSCSAVG00000003350/ENSCSAVG00000009414/ENSCSAVG00000007278/ENSCSAVG00000000185/ENSCSAVG00000009170/ENSCSAVG00000001409/ENSCSAVG00000001223/novel.3395/ENSCSAVG00000010951/ENSCSAVG00000010872/ENSCSAVG00000011754/ENSCSAVG00000006332/ENSCSAVG00000008344/ENSCSAVG00000009194/ENSCSAVG00000003815	-/-/-/-/-/-/-/-/-/-/-/-/-/-/-/-/-	17
BP	GO:0044257	cellular protein catabolic process	17/513	29/3685	2.21924e-08	2.71857e-07	ENSCSAVG00000006248/ENSCSAVG00000005078/ENSCSAVG00000007029/ENSCSAVG00000001392/ENSCSAVG00000011135/ENSCSAVG00000003542/ENSCSAVG00000000720/ENSCSAVG00000010386/ENSCSAVG00000008740/ENSCSAVG00000010631/ENSCSAVG00000009761/ENSCSAVG00000005269/ENSCSAVG00000005488/novel.2918/ENSCSAVG00000010007/ENSCSAVG00000000219/ENSCSAVG00000010026	-/-/-/-/-/-/-/-/-/-/-/-/-/-/-/-/-	17
BP	GO:0051603	proteolysis involved in cellular protein catabolic process	17/513	29/3685	2.21924e-08	2.71857e-07	ENSCSAVG00000006248/ENSCSAVG00000005078/ENSCSAVG00000007029/ENSCSAVG00000001392/ENSCSAVG00000011135/ENSCSAVG00000003542/ENSCSAVG00000000720/ENSCSAVG00000010386/ENSCSAVG00000008740/ENSCSAVG00000010631/ENSCSAVG00000009761/ENSCSAVG00000005269/ENSCSAVG00000005488/novel.2918/ENSCSAVG00000010007/ENSCSAVG00000000219/ENSCSAVG00000010026	-/-/-/-/-/-/-/-/-/-/-/-/-/-/-/-/-	17
BP	GO:1901565	organonitrogen compound catabolic process	20/513	39/3685	2.76284e-08	3.26777e-07	ENSCSAVG00000006248/ENSCSAVG00000005078/ENSCSAVG00000007029/ENSCSAVG00000001392/ENSCSAVG00000011135/ENSCSAVG00000003542/ENSCSAVG00000000720/ENSCSAVG00000010386/ENSCSAVG00000008740/ENSCSAVG00000010631/ENSCSAVG00000009761/ENSCSAVG00000005269/ENSCSAVG00000009758/ENSCSAVG00000005488/novel.2918/ENSCSAVG00000005638/ENSCSAVG00000010007/ENSCSAVG00000000219/ENSCSAVG00000010026/ENSCSAVG00000006662	-/-/-/-/-/-/-/-/-/-/-/-/-/-/-/-/-/-/-/-	20
BP	GO:0009127	purine nucleoside monophosphate biosynthetic process	12/513	16/3685	5.03709e-08	5.39913e-07	ENSCSAVG00000010715/ENSCSAVG00000009414/ENSCSAVG00000007278/ENSCSAVG00000000185/ENSCSAVG00000009170/ENSCSAVG00000001409/novel.3395/ENSCSAVG00000010951/ENSCSAVG00000010872/ENSCSAVG00000008344/ENSCSAVG00000003815/ENSCSAVG00000005799	-/-/-/-/-/-/-/-/-/-/-/-	12
BP	GO:0009156	ribonucleoside monophosphate biosynthetic process	12/513	16/3685	5.03709e-08	5.39913e-07	ENSCSAVG00000010715/ENSCSAVG00000009414/ENSCSAVG00000007278/ENSCSAVG00000000185/ENSCSAVG00000009170/ENSCSAVG00000001409/novel.3395/ENSCSAVG00000010951/ENSCSAVG00000010872/ENSCSAVG00000008344/ENSCSAVG00000003815/ENSCSAVG00000005799	-/-/-/-/-/-/-/-/-/-/-/-	12
BP	GO:0009168	purine ribonucleoside monophosphate biosynthetic process	12/513	16/3685	5.03709e-08	5.39913e-07	ENSCSAVG00000010715/ENSCSAVG00000009414/ENSCSAVG00000007278/ENSCSAVG00000000185/ENSCSAVG00000009170/ENSCSAVG00000001409/novel.3395/ENSCSAVG00000010951/ENSCSAVG00000010872/ENSCSAVG00000008344/ENSCSAVG00000003815/ENSCSAVG00000005799	-/-/-/-/-/-/-/-/-/-/-/-	12
BP	GO:0006754	ATP biosynthetic process	11/513	14/3685	8.45239e-08	8.78537e-07	ENSCSAVG00000010715/ENSCSAVG00000009414/ENSCSAVG00000007278/ENSCSAVG00000000185/ENSCSAVG00000009170/ENSCSAVG00000001409/novel.3395/ENSCSAVG00000010951/ENSCSAVG00000010872/ENSCSAVG00000008344/ENSCSAVG00000003815	-/-/-/-/-/-/-/-/-/-/-	11
BP	GO:0009057	macromolecule catabolic process	19/513	39/3685	1.79413e-07	1.80996e-06	ENSCSAVG00000006248/ENSCSAVG00000005078/ENSCSAVG00000007029/ENSCSAVG00000001392/ENSCSAVG00000011135/ENSCSAVG00000003542/ENSCSAVG00000000720/ENSCSAVG00000010386/ENSCSAVG00000008740/ENSCSAVG00000010631/ENSCSAVG00000009761/ENSCSAVG00000005269/ENSCSAVG00000009758/ENSCSAVG00000005488/novel.2918/ENSCSAVG00000010007/ENSCSAVG00000000219/ENSCSAVG00000010026/ENSCSAVG00000000170	-/-/-/-/-/-/-/-/-/-/-/-/-/-/-/-/-/-/-	19
BP	GO:0044265	cellular macromolecule catabolic process	18/513	36/3685	2.30814e-07	2.26197e-06	ENSCSAVG00000006248/ENSCSAVG00000005078/ENSCSAVG00000007029/ENSCSAVG00000001392/ENSCSAVG00000011135/ENSCSAVG00000003542/ENSCSAVG00000000720/ENSCSAVG00000010386/ENSCSAVG00000008740/ENSCSAVG00000010631/ENSCSAVG00000009761/ENSCSAVG00000005269/ENSCSAVG00000005488/novel.2918/ENSCSAVG00000010007/ENSCSAVG00000000219/ENSCSAVG00000010026/ENSCSAVG00000000170	-/-/-/-/-/-/-/-/-/-/-/-/-/-/-/-/-/-	18
BP	GO:0006163	purine nucleotide metabolic process	19/513	43/3685	1.20726e-06	1.15025e-05	ENSCSAVG00000011741/ENSCSAVG00000010715/ENSCSAVG00000003350/ENSCSAVG00000009414/ENSCSAVG00000007278/ENSCSAVG00000000185/ENSCSAVG00000009170/ENSCSAVG00000001409/ENSCSAVG00000001223/novel.3395/ENSCSAVG00000010951/ENSCSAVG00000010872/ENSCSAVG00000011754/ENSCSAVG00000006332/ENSCSAVG00000008344/ENSCSAVG00000009194/ENSCSAVG00000003815/ENSCSAVG00000002485/ENSCSAVG00000005799	-/-/-/-/-/-/-/-/-/-/-/-/-/-/-/-/-/-/-	19
BP	GO:0051276	chromosome organization	17/513	36/3685	1.41819e-06	1.3147e-05	ENSCSAVG00000002707/ENSCSAVG00000000937/ENSCSAVG00000006648/ENSCSAVG00000010517/ENSCSAVG00000005714/ENSCSAVG00000006869/ENSCSAVG00000005597/ENSCSAVG00000010169/ENSCSAVG00000000211/ENSCSAVG00000002652/ENSCSAVG00000003966/ENSCSAVG00000005549/ENSCSAVG00000005137/novel.5331/ENSCSAVG00000003257/novel.238/ENSCSAVG00000006829	-/-/-/-/-/-/-/-/-/-/-/-/-/-/-/-/-	17
BP	GO:0072521	purine-containing compound metabolic process	19/513	44/3685	1.85393e-06	1.64919e-05	ENSCSAVG00000011741/ENSCSAVG00000010715/ENSCSAVG00000003350/ENSCSAVG00000009414/ENSCSAVG00000007278/ENSCSAVG00000000185/ENSCSAVG00000009170/ENSCSAVG00000001409/ENSCSAVG00000001223/novel.3395/ENSCSAVG00000010951/ENSCSAVG00000010872/ENSCSAVG00000011754/ENSCSAVG00000006332/ENSCSAVG00000008344/ENSCSAVG00000009194/ENSCSAVG00000003815/ENSCSAVG00000002485/ENSCSAVG00000005799	-/-/-/-/-/-/-/-/-/-/-/-/-/-/-/-/-/-/-	19
BP	GO:0006164	purine nucleotide biosynthetic process	16/513	33/3685	1.87517e-06	1.64919e-05	ENSCSAVG00000010715/ENSCSAVG00000009414/ENSCSAVG00000007278/ENSCSAVG00000000185/ENSCSAVG00000009170/ENSCSAVG00000001409/novel.3395/ENSCSAVG00000010951/ENSCSAVG00000010872/ENSCSAVG00000011754/ENSCSAVG00000006332/ENSCSAVG00000008344/ENSCSAVG00000009194/ENSCSAVG00000003815/ENSCSAVG00000002485/ENSCSAVG00000005799	-/-/-/-/-/-/-/-/-/-/-/-/-/-/-/-	16
BP	GO:0009150	purine ribonucleotide metabolic process	18/513	41/3685	2.60155e-06	2.17642e-05	ENSCSAVG00000011741/ENSCSAVG00000010715/ENSCSAVG00000003350/ENSCSAVG00000009414/ENSCSAVG00000007278/ENSCSAVG00000000185/ENSCSAVG00000009170/ENSCSAVG00000001409/ENSCSAVG00000001223/novel.3395/ENSCSAVG00000010951/ENSCSAVG00000010872/ENSCSAVG00000011754/ENSCSAVG00000006332/ENSCSAVG00000008344/ENSCSAVG00000009194/ENSCSAVG00000003815/ENSCSAVG00000005799	-/-/-/-/-/-/-/-/-/-/-/-/-/-/-/-/-/-	18
BP	GO:0009259	ribonucleotide metabolic process	18/513	41/3685	2.60155e-06	2.17642e-05	ENSCSAVG00000011741/ENSCSAVG00000010715/ENSCSAVG00000003350/ENSCSAVG00000009414/ENSCSAVG00000007278/ENSCSAVG00000000185/ENSCSAVG00000009170/ENSCSAVG00000001409/ENSCSAVG00000001223/novel.3395/ENSCSAVG00000010951/ENSCSAVG00000010872/ENSCSAVG00000011754/ENSCSAVG00000006332/ENSCSAVG00000008344/ENSCSAVG00000009194/ENSCSAVG00000003815/ENSCSAVG00000005799	-/-/-/-/-/-/-/-/-/-/-/-/-/-/-/-/-/-	18
BP	GO:0009132	nucleoside diphosphate metabolic process	9/513	12/3685	2.74013e-06	2.23777e-05	ENSCSAVG00000010715/ENSCSAVG00000001409/ENSCSAVG00000010872/ENSCSAVG00000011754/ENSCSAVG00000006332/ENSCSAVG00000008344/ENSCSAVG00000009194/ENSCSAVG00000003815/ENSCSAVG00000000347	-/-/-/-/-/-/-/-/-	9
BP	GO:0072522	purine-containing compound biosynthetic process	16/513	34/3685	3.09289e-06	2.46712e-05	ENSCSAVG00000010715/ENSCSAVG00000009414/ENSCSAVG00000007278/ENSCSAVG00000000185/ENSCSAVG00000009170/ENSCSAVG00000001409/novel.3395/ENSCSAVG00000010951/ENSCSAVG00000010872/ENSCSAVG00000011754/ENSCSAVG00000006332/ENSCSAVG00000008344/ENSCSAVG00000009194/ENSCSAVG00000003815/ENSCSAVG00000002485/ENSCSAVG00000005799	-/-/-/-/-/-/-/-/-/-/-/-/-/-/-/-	16
BP	GO:0044281	small molecule metabolic process	50/513	192/3685	3.51488e-06	2.74001e-05	ENSCSAVG00000011741/ENSCSAVG00000010715/ENSCSAVG00000000230/ENSCSAVG00000003350/ENSCSAVG00000001442/ENSCSAVG00000009414/ENSCSAVG00000004790/ENSCSAVG00000007278/ENSCSAVG00000000185/ENSCSAVG00000009170/ENSCSAVG00000001409/ENSCSAVG00000001223/novel.3395/ENSCSAVG00000010951/ENSCSAVG00000010872/ENSCSAVG00000004166/ENSCSAVG00000011754/ENSCSAVG00000008634/ENSCSAVG00000004857/ENSCSAVG00000003598/ENSCSAVG…	-/-/-/-/-/-/-/-/-/-/-/-/-/-/-/-/-/-/-/-/-/-/-/-/-/-/-/-/-/-/-/-/-/-/-/-/-/-/-/-/-/-/-/-/-/-/-/-/-/-	50
BP	GO:0034404	nucleobase-containing small molecule biosynthetic process	10/513	15/3685	3.92087e-06	2.91379e-05	ENSCSAVG00000010715/ENSCSAVG00000001409/ENSCSAVG00000010872/ENSCSAVG00000011754/ENSCSAVG00000006332/ENSCSAVG00000008344/ENSCSAVG00000010017/ENSCSAVG00000009194/ENSCSAVG00000003815/ENSCSAVG00000008757	-/-/-/-/-/-/-/-/-/-	10
BP	GO:0009152	purine ribonucleotide biosynthetic process	15/513	31/3685	4.10244e-06	2.91379e-05	ENSCSAVG00000010715/ENSCSAVG00000009414/ENSCSAVG00000007278/ENSCSAVG00000000185/ENSCSAVG00000009170/ENSCSAVG00000001409/novel.3395/ENSCSAVG00000010951/ENSCSAVG00000010872/ENSCSAVG00000011754/ENSCSAVG00000006332/ENSCSAVG00000008344/ENSCSAVG00000009194/ENSCSAVG00000003815/ENSCSAVG00000005799	-/-/-/-/-/-/-/-/-/-/-/-/-/-/-	15
BP	GO:0009260	ribonucleotide biosynthetic process	15/513	31/3685	4.10244e-06	2.91379e-05	ENSCSAVG00000010715/ENSCSAVG00000009414/ENSCSAVG00000007278/ENSCSAVG00000000185/ENSCSAVG00000009170/ENSCSAVG00000001409/novel.3395/ENSCSAVG00000010951/ENSCSAVG00000010872/ENSCSAVG00000011754/ENSCSAVG00000006332/ENSCSAVG00000008344/ENSCSAVG00000009194/ENSCSAVG00000003815/ENSCSAVG00000005799	-/-/-/-/-/-/-/-/-/-/-/-/-/-/-	15
BP	GO:0046390	ribose phosphate biosynthetic process	15/513	31/3685	4.10244e-06	2.91379e-05	ENSCSAVG00000010715/ENSCSAVG00000009414/ENSCSAVG00000007278/ENSCSAVG00000000185/ENSCSAVG00000009170/ENSCSAVG00000001409/novel.3395/ENSCSAVG00000010951/ENSCSAVG00000010872/ENSCSAVG00000011754/ENSCSAVG00000006332/ENSCSAVG00000008344/ENSCSAVG00000009194/ENSCSAVG00000003815/ENSCSAVG00000005799	-/-/-/-/-/-/-/-/-/-/-/-/-/-/-	15
BP	GO:0022613	ribonucleoprotein complex biogenesis	12/513	21/3685	4.16256e-06	2.91379e-05	ENSCSAVG00000004833/ENSCSAVG00000006355/ENSCSAVG00000007935/ENSCSAVG00000001875/ENSCSAVG00000011819/ENSCSAVG00000004990/ENSCSAVG00000006877/ENSCSAVG00000011770/ENSCSAVG00000011811/ENSCSAVG00000006653/ENSCSAVG00000002672/ENSCSAVG00000001404	-/-/-/-/-/-/-/-/-/-/-/-	12
BP	GO:0006753	nucleoside phosphate metabolic process	24/513	67/3685	4.67848e-06	3.20944e-05	ENSCSAVG00000011741/ENSCSAVG00000010715/ENSCSAVG00000003350/ENSCSAVG00000009414/ENSCSAVG00000007278/ENSCSAVG00000000185/ENSCSAVG00000009170/ENSCSAVG00000001409/ENSCSAVG00000001223/novel.3395/ENSCSAVG00000010951/ENSCSAVG00000010872/ENSCSAVG00000011754/ENSCSAVG00000004857/ENSCSAVG00000006332/ENSCSAVG00000005243/ENSCSAVG00000008344/ENSCSAVG00000010017/ENSCSAVG00000009194/ENSCSAVG00000003815/ENSCSAVG…	-/-/-/-/-/-/-/-/-/-/-/-/-/-/-/-/-/-/-/-/-/-/-/-	24
BP	GO:0071840	cellular component organization or biogenesis	40/513	143/3685	5.42288e-06	3.64715e-05	ENSCSAVG00000002707/ENSCSAVG00000008552/ENSCSAVG00000000937/ENSCSAVG00000006648/ENSCSAVG00000010517/ENSCSAVG00000005714/ENSCSAVG00000006869/ENSCSAVG00000004833/ENSCSAVG00000006355/ENSCSAVG00000005597/ENSCSAVG00000009426/ENSCSAVG00000007935/ENSCSAVG00000003500/novel.6857/ENSCSAVG00000001875/ENSCSAVG00000011819/ENSCSAVG00000004990/ENSCSAVG00000006877/ENSCSAVG00000010169/ENSCSAVG00000011555/ENSCSAVG…	-/-/-/-/-/-/-/-/-/-/-/-/-/-/-/-/-/-/-/-/-/-/-/-/-/-/-/-/-/-/-/-/-/-/-/-/-/-/-/-	40
BP	GO:0019693	ribose phosphate metabolic process	18/513	43/3685	5.96519e-06	3.93473e-05	ENSCSAVG00000011741/ENSCSAVG00000010715/ENSCSAVG00000003350/ENSCSAVG00000009414/ENSCSAVG00000007278/ENSCSAVG00000000185/ENSCSAVG00000009170/ENSCSAVG00000001409/ENSCSAVG00000001223/novel.3395/ENSCSAVG00000010951/ENSCSAVG00000010872/ENSCSAVG00000011754/ENSCSAVG00000006332/ENSCSAVG00000008344/ENSCSAVG00000009194/ENSCSAVG00000003815/ENSCSAVG00000005799	-/-/-/-/-/-/-/-/-/-/-/-/-/-/-/-/-/-	18
BP	GO:0017144	drug metabolic process	17/513	41/3685	1.26809e-05	8.20673e-05	ENSCSAVG00000011741/ENSCSAVG00000010715/ENSCSAVG00000003350/ENSCSAVG00000009414/ENSCSAVG00000007278/ENSCSAVG00000000185/ENSCSAVG00000009170/ENSCSAVG00000001409/ENSCSAVG00000001223/novel.3395/ENSCSAVG00000010951/ENSCSAVG00000010872/ENSCSAVG00000004038/ENSCSAVG00000008344/ENSCSAVG00000011265/ENSCSAVG00000003815/ENSCSAVG00000005638	-/-/-/-/-/-/-/-/-/-/-/-/-/-/-/-/-	17
BP	GO:0055086	nucleobase-containing small molecule metabolic process	26/513	80/3685	1.45266e-05	9.20765e-05	ENSCSAVG00000011741/ENSCSAVG00000010715/ENSCSAVG00000003350/ENSCSAVG00000009414/ENSCSAVG00000007278/ENSCSAVG00000000185/ENSCSAVG00000009170/ENSCSAVG00000001409/ENSCSAVG00000001223/novel.3395/ENSCSAVG00000010951/ENSCSAVG00000010872/ENSCSAVG00000004166/ENSCSAVG00000011754/ENSCSAVG00000004857/ENSCSAVG00000006332/ENSCSAVG00000005243/ENSCSAVG00000008344/ENSCSAVG00000010017/ENSCSAVG00000009194/ENSCSAVG…	-/-/-/-/-/-/-/-/-/-/-/-/-/-/-/-/-/-/-/-/-/-/-/-/-/-	26
BP	GO:0006165	nucleoside diphosphate phosphorylation	8/513	11/3685	1.50329e-05	9.20765e-05	ENSCSAVG00000010715/ENSCSAVG00000001409/ENSCSAVG00000010872/ENSCSAVG00000011754/ENSCSAVG00000006332/ENSCSAVG00000008344/ENSCSAVG00000009194/ENSCSAVG00000003815	-/-/-/-/-/-/-/-	8
BP	GO:0046939	nucleotide phosphorylation	8/513	11/3685	1.50329e-05	9.20765e-05	ENSCSAVG00000010715/ENSCSAVG00000001409/ENSCSAVG00000010872/ENSCSAVG00000011754/ENSCSAVG00000006332/ENSCSAVG00000008344/ENSCSAVG00000009194/ENSCSAVG00000003815	-/-/-/-/-/-/-/-	8
BP	GO:0009165	nucleotide biosynthetic process	19/513	50/3685	1.76703e-05	0.000104498	ENSCSAVG00000010715/ENSCSAVG00000009414/ENSCSAVG00000007278/ENSCSAVG00000000185/ENSCSAVG00000009170/ENSCSAVG00000001409/novel.3395/ENSCSAVG00000010951/ENSCSAVG00000010872/ENSCSAVG00000011754/ENSCSAVG00000004857/ENSCSAVG00000006332/ENSCSAVG00000005243/ENSCSAVG00000008344/ENSCSAVG00000009194/ENSCSAVG00000003815/ENSCSAVG00000008549/ENSCSAVG00000002485/ENSCSAVG00000005799	-/-/-/-/-/-/-/-/-/-/-/-/-/-/-/-/-/-/-	19
BP	GO:1901293	nucleoside phosphate biosynthetic process	19/513	50/3685	1.76703e-05	0.000104498	ENSCSAVG00000010715/ENSCSAVG00000009414/ENSCSAVG00000007278/ENSCSAVG00000000185/ENSCSAVG00000009170/ENSCSAVG00000001409/novel.3395/ENSCSAVG00000010951/ENSCSAVG00000010872/ENSCSAVG00000011754/ENSCSAVG00000004857/ENSCSAVG00000006332/ENSCSAVG00000005243/ENSCSAVG00000008344/ENSCSAVG00000009194/ENSCSAVG00000003815/ENSCSAVG00000008549/ENSCSAVG00000002485/ENSCSAVG00000005799	-/-/-/-/-/-/-/-/-/-/-/-/-/-/-/-/-/-/-	19
BP	GO:0044085	cellular component biogenesis	24/513	73/3685	2.5052e-05	0.000141908	ENSCSAVG00000002707/ENSCSAVG00000006648/ENSCSAVG00000004833/ENSCSAVG00000006355/ENSCSAVG00000007935/novel.6857/ENSCSAVG00000001875/ENSCSAVG00000011819/ENSCSAVG00000004990/ENSCSAVG00000006877/ENSCSAVG00000011555/ENSCSAVG00000011770/ENSCSAVG00000011811/ENSCSAVG00000001417/ENSCSAVG00000009303/ENSCSAVG00000005658/ENSCSAVG00000006653/ENSCSAVG00000003966/ENSCSAVG00000002672/ENSCSAVG00000011694/novel.53…	-/-/-/-/-/-/-/-/-/-/-/-/-/-/-/-/-/-/-/-/-/-/-/-	24
BP	GO:0006511	ubiquitin-dependent protein catabolic process	12/513	24/3685	2.5651e-05	0.000141908	ENSCSAVG00000006248/ENSCSAVG00000003542/ENSCSAVG00000000720/ENSCSAVG00000010386/ENSCSAVG00000008740/ENSCSAVG00000010631/ENSCSAVG00000005269/ENSCSAVG00000005488/novel.2918/ENSCSAVG00000010007/ENSCSAVG00000000219/ENSCSAVG00000010026	-/-/-/-/-/-/-/-/-/-/-/-	12
BP	GO:0019941	modification-dependent protein catabolic process	12/513	24/3685	2.5651e-05	0.000141908	ENSCSAVG00000006248/ENSCSAVG00000003542/ENSCSAVG00000000720/ENSCSAVG00000010386/ENSCSAVG00000008740/ENSCSAVG00000010631/ENSCSAVG00000005269/ENSCSAVG00000005488/novel.2918/ENSCSAVG00000010007/ENSCSAVG00000000219/ENSCSAVG00000010026	-/-/-/-/-/-/-/-/-/-/-/-	12
BP	GO:0043632	modification-dependent macromolecule catabolic process	12/513	24/3685	2.5651e-05	0.000141908	ENSCSAVG00000006248/ENSCSAVG00000003542/ENSCSAVG00000000720/ENSCSAVG00000010386/ENSCSAVG00000008740/ENSCSAVG00000010631/ENSCSAVG00000005269/ENSCSAVG00000005488/novel.2918/ENSCSAVG00000010007/ENSCSAVG00000000219/ENSCSAVG00000010026	-/-/-/-/-/-/-/-/-/-/-/-	12
BP	GO:0009117	nucleotide metabolic process	22/513	65/3685	3.28253e-05	0.000178715	ENSCSAVG00000011741/ENSCSAVG00000010715/ENSCSAVG00000003350/ENSCSAVG00000009414/ENSCSAVG00000007278/ENSCSAVG00000000185/ENSCSAVG00000009170/ENSCSAVG00000001409/ENSCSAVG00000001223/novel.3395/ENSCSAVG00000010951/ENSCSAVG00000010872/ENSCSAVG00000011754/ENSCSAVG00000004857/ENSCSAVG00000006332/ENSCSAVG00000005243/ENSCSAVG00000008344/ENSCSAVG00000009194/ENSCSAVG00000003815/ENSCSAVG00000008549/ENSCSAVG…	-/-/-/-/-/-/-/-/-/-/-/-/-/-/-/-/-/-/-/-/-/-	22
BP	GO:0007049	cell cycle	14/513	32/3685	3.64611e-05	0.000195409	ENSCSAVG00000004857/ENSCSAVG00000001397/ENSCSAVG00000006666/ENSCSAVG00000009426/ENSCSAVG00000002240/ENSCSAVG00000006645/ENSCSAVG00000009300/ENSCSAVG00000010169/ENSCSAVG00000011555/ENSCSAVG00000005674/ENSCSAVG00000005225/ENSCSAVG00000003496/ENSCSAVG00000005137/ENSCSAVG00000003257	-/-/-/-/-/-/-/-/-/-/-/-/-/-	14
BP	GO:0042254	ribosome biogenesis	10/513	18/3685	3.8448e-05	0.000202887	ENSCSAVG00000004833/ENSCSAVG00000006355/ENSCSAVG00000001875/ENSCSAVG00000011819/ENSCSAVG00000006877/ENSCSAVG00000011770/ENSCSAVG00000011811/ENSCSAVG00000006653/ENSCSAVG00000002672/ENSCSAVG00000001404	-/-/-/-/-/-/-/-/-/-	10
BP	GO:0019637	organophosphate metabolic process	31/513	110/3685	5.44184e-05	0.000282811	ENSCSAVG00000011741/ENSCSAVG00000010715/ENSCSAVG00000003350/ENSCSAVG00000009414/ENSCSAVG00000007278/ENSCSAVG00000000185/ENSCSAVG00000009170/ENSCSAVG00000001409/ENSCSAVG00000001223/novel.3395/ENSCSAVG00000010951/ENSCSAVG00000010872/ENSCSAVG00000011754/ENSCSAVG00000004857/ENSCSAVG00000003525/ENSCSAVG00000006332/ENSCSAVG00000005243/ENSCSAVG00000004264/ENSCSAVG00000008344/ENSCSAVG00000003698/ENSCSAVG…	-/-/-/-/-/-/-/-/-/-/-/-/-/-/-/-/-/-/-/-/-/-/-/-/-/-/-/-/-/-/-	31
BP	GO:0034622	cellular protein-containing complex assembly	13/513	30/3685	7.86258e-05	0.000399324	ENSCSAVG00000002707/ENSCSAVG00000006648/ENSCSAVG00000004833/ENSCSAVG00000007935/ENSCSAVG00000004990/ENSCSAVG00000001417/ENSCSAVG00000009303/ENSCSAVG00000005658/ENSCSAVG00000003966/ENSCSAVG00000011694/novel.5331/ENSCSAVG00000005058/novel.238	-/-/-/-/-/-/-/-/-/-/-/-/-	13
BP	GO:0044283	small molecule biosynthetic process	16/513	42/3685	7.91662e-05	0.000399324	ENSCSAVG00000010715/ENSCSAVG00000000230/ENSCSAVG00000001409/ENSCSAVG00000010872/ENSCSAVG00000011754/ENSCSAVG00000006332/ENSCSAVG00000008344/ENSCSAVG00000010017/ENSCSAVG00000009194/ENSCSAVG00000003815/ENSCSAVG00000001584/ENSCSAVG00000008757/ENSCSAVG00000005507/ENSCSAVG00000010449/novel.1585/novel.3427	-/-/-/-/-/-/-/-/-/-/-/-/-/-/-/-	16
BP	GO:0006352	DNA-templated transcription, initiation	8/513	13/3685	9.05111e-05	0.000443505	ENSCSAVG00000000312/ENSCSAVG00000008629/ENSCSAVG00000007153/ENSCSAVG00000001053/ENSCSAVG00000002671/ENSCSAVG00000010502/ENSCSAVG00000009560/novel.3974	-/-/-/-/-/-/-/-	8
BP	GO:0006413	translational initiation	8/513	13/3685	9.05111e-05	0.000443505	ENSCSAVG00000008435/ENSCSAVG00000008729/ENSCSAVG00000007678/ENSCSAVG00000011706/ENSCSAVG00000004949/ENSCSAVG00000008066/novel.5068/ENSCSAVG00000007532	-/-/-/-/-/-/-/-	8
BP	GO:0006091	generation of precursor metabolites and energy	8/513	14/3685	0.000185614	0.000896698	ENSCSAVG00000010715/ENSCSAVG00000001409/ENSCSAVG00000001223/ENSCSAVG00000010872/ENSCSAVG00000004038/ENSCSAVG00000008344/ENSCSAVG00000001187/ENSCSAVG00000003815	-/-/-/-/-/-/-/-	8
BP	GO:0006996	organelle organization	24/513	82/3685	0.000201482	0.000959836	ENSCSAVG00000002707/ENSCSAVG00000008552/ENSCSAVG00000000937/ENSCSAVG00000006648/ENSCSAVG00000010517/ENSCSAVG00000005714/ENSCSAVG00000006869/ENSCSAVG00000004833/ENSCSAVG00000005597/ENSCSAVG00000009426/novel.6857/ENSCSAVG00000010169/ENSCSAVG00000011555/ENSCSAVG00000000211/ENSCSAVG00000009303/ENSCSAVG00000002652/ENSCSAVG00000005658/ENSCSAVG00000003966/ENSCSAVG00000005549/ENSCSAVG00000005137/novel.53…	-/-/-/-/-/-/-/-/-/-/-/-/-/-/-/-/-/-/-/-/-/-/-/-	24
BP	GO:0090407	organophosphate biosynthetic process	23/513	79/3685	0.000297318	0.00139699	ENSCSAVG00000010715/ENSCSAVG00000009414/ENSCSAVG00000007278/ENSCSAVG00000000185/ENSCSAVG00000009170/ENSCSAVG00000001409/novel.3395/ENSCSAVG00000010951/ENSCSAVG00000010872/ENSCSAVG00000011754/ENSCSAVG00000004857/ENSCSAVG00000006332/ENSCSAVG00000005243/ENSCSAVG00000008344/ENSCSAVG00000003698/ENSCSAVG00000009194/ENSCSAVG00000003815/ENSCSAVG00000008549/ENSCSAVG00000002485/ENSCSAVG00000007715/ENSCSAVG…	-/-/-/-/-/-/-/-/-/-/-/-/-/-/-/-/-/-/-/-/-/-/-	23
BP	GO:0006260	DNA replication	13/513	34/3685	0.000357158	0.00165548	ENSCSAVG00000007691/ENSCSAVG00000008985/ENSCSAVG00000001702/ENSCSAVG00000000485/ENSCSAVG00000001447/ENSCSAVG00000007575/ENSCSAVG00000010725/ENSCSAVG00000001889/ENSCSAVG00000006861/ENSCSAVG00000006632/ENSCSAVG00000007912/ENSCSAVG00000000445/ENSCSAVG00000010255	-/-/-/-/-/-/-/-/-/-/-/-/-	13
BP	GO:0034470	ncRNA processing	12/513	31/3685	0.000527696	0.00241333	ENSCSAVG00000004963/ENSCSAVG00000000894/ENSCSAVG00000001680/ENSCSAVG00000008757/ENSCSAVG00000000525/ENSCSAVG00000011282/ENSCSAVG00000006653/ENSCSAVG00000001943/ENSCSAVG00000002672/ENSCSAVG00000005308/ENSCSAVG00000001404/novel.5827	-/-/-/-/-/-/-/-/-/-/-/-	12
BP	GO:0090304	nucleic acid metabolic process	93/513	496/3685	0.00076839	0.00344908	ENSCSAVG00000003053/ENSCSAVG00000005696/ENSCSAVG00000008100/ENSCSAVG00000000937/ENSCSAVG00000007691/ENSCSAVG00000003919/ENSCSAVG00000006666/ENSCSAVG00000004438/ENSCSAVG00000010433/ENSCSAVG00000005488/ENSCSAVG00000000312/ENSCSAVG00000010448/ENSCSAVG00000008629/ENSCSAVG00000006355/ENSCSAVG00000004963/ENSCSAVG00000008985/ENSCSAVG00000007153/ENSCSAVG00000001702/ENSCSAVG00000000485/ENSCSAVG00000007935…	-/-/-/-/-/-/-/-/-/-/-/-/-/-/-/-/-/-/-/-/-/-/-/-/-/-/-/-/-/-/-/-/-/-/-/-/-/-/-/-/-/-/-/-/-/-/-/-/-/-/-/-/-/-/-/-/-/-/-/-/-/-/-/-/-/-/-/-/-/-/-/-/-/-/-/-/-/-/-/-/-/-/-/-/-/-/-/-/-/-/-/-/-	93
BP	GO:0046434	organophosphate catabolic process	7/513	13/3685	0.000780663	0.00344908	ENSCSAVG00000010715/ENSCSAVG00000001409/ENSCSAVG00000010872/ENSCSAVG00000004264/ENSCSAVG00000008344/ENSCSAVG00000010017/ENSCSAVG00000003815	-/-/-/-/-/-/-	7
BP	GO:0016043	cellular component organization	31/513	126/3685	0.00078434	0.00344908	ENSCSAVG00000002707/ENSCSAVG00000008552/ENSCSAVG00000000937/ENSCSAVG00000006648/ENSCSAVG00000010517/ENSCSAVG00000005714/ENSCSAVG00000006869/ENSCSAVG00000004833/ENSCSAVG00000005597/ENSCSAVG00000009426/ENSCSAVG00000007935/ENSCSAVG00000003500/novel.6857/ENSCSAVG00000004990/ENSCSAVG00000010169/ENSCSAVG00000011555/ENSCSAVG00000000157/ENSCSAVG00000001417/ENSCSAVG00000000211/ENSCSAVG00000009303/ENSCSAVG…	-/-/-/-/-/-/-/-/-/-/-/-/-/-/-/-/-/-/-/-/-/-/-/-/-/-/-/-/-/-/-	31
BP	GO:0019752	carboxylic acid metabolic process	25/513	96/3685	0.00104636	0.00454307	ENSCSAVG00000010715/ENSCSAVG00000000230/ENSCSAVG00000004790/ENSCSAVG00000001409/ENSCSAVG00000010872/ENSCSAVG00000008634/ENSCSAVG00000003598/ENSCSAVG00000010244/ENSCSAVG00000004038/ENSCSAVG00000008344/ENSCSAVG00000007435/ENSCSAVG00000004438/ENSCSAVG00000011403/ENSCSAVG00000003815/novel.12/ENSCSAVG00000001584/ENSCSAVG00000005638/ENSCSAVG00000011808/ENSCSAVG00000006662/ENSCSAVG00000007684/ENSCSAVG00…	-/-/-/-/-/-/-/-/-/-/-/-/-/-/-/-/-/-/-/-/-/-/-/-/-	25
BP	GO:0006082	organic acid metabolic process	25/513	97/3685	0.00123002	0.00520861	ENSCSAVG00000010715/ENSCSAVG00000000230/ENSCSAVG00000004790/ENSCSAVG00000001409/ENSCSAVG00000010872/ENSCSAVG00000008634/ENSCSAVG00000003598/ENSCSAVG00000010244/ENSCSAVG00000004038/ENSCSAVG00000008344/ENSCSAVG00000007435/ENSCSAVG00000004438/ENSCSAVG00000011403/ENSCSAVG00000003815/novel.12/ENSCSAVG00000001584/ENSCSAVG00000005638/ENSCSAVG00000011808/ENSCSAVG00000006662/ENSCSAVG00000007684/ENSCSAVG00…	-/-/-/-/-/-/-/-/-/-/-/-/-/-/-/-/-/-/-/-/-/-/-/-/-	25
BP	GO:0043436	oxoacid metabolic process	25/513	97/3685	0.00123002	0.00520861	ENSCSAVG00000010715/ENSCSAVG00000000230/ENSCSAVG00000004790/ENSCSAVG00000001409/ENSCSAVG00000010872/ENSCSAVG00000008634/ENSCSAVG00000003598/ENSCSAVG00000010244/ENSCSAVG00000004038/ENSCSAVG00000008344/ENSCSAVG00000007435/ENSCSAVG00000004438/ENSCSAVG00000011403/ENSCSAVG00000003815/novel.12/ENSCSAVG00000001584/ENSCSAVG00000005638/ENSCSAVG00000011808/ENSCSAVG00000006662/ENSCSAVG00000007684/ENSCSAVG00…	-/-/-/-/-/-/-/-/-/-/-/-/-/-/-/-/-/-/-/-/-/-/-/-/-	25
BP	GO:0006325	chromatin organization	8/513	18/3685	0.00161769	0.00675704	ENSCSAVG00000002707/ENSCSAVG00000006648/ENSCSAVG00000010517/ENSCSAVG00000005714/ENSCSAVG00000006869/ENSCSAVG00000000211/ENSCSAVG00000002652/ENSCSAVG00000005549	-/-/-/-/-/-/-/-	8
BP	GO:0032787	monocarboxylic acid metabolic process	10/513	26/3685	0.00163509	0.00675704	ENSCSAVG00000010715/ENSCSAVG00000001409/ENSCSAVG00000010872/ENSCSAVG00000008634/ENSCSAVG00000003598/ENSCSAVG00000010244/ENSCSAVG00000008344/ENSCSAVG00000007435/ENSCSAVG00000003815/novel.3427	-/-/-/-/-/-/-/-/-/-	10
BP	GO:0006396	RNA processing	20/513	75/3685	0.00239867	0.00979459	ENSCSAVG00000003919/ENSCSAVG00000004963/ENSCSAVG00000007935/ENSCSAVG00000000894/ENSCSAVG00000001680/ENSCSAVG00000008757/ENSCSAVG00000009934/ENSCSAVG00000004990/ENSCSAVG00000000525/ENSCSAVG00000003437/ENSCSAVG00000011282/ENSCSAVG00000006653/ENSCSAVG00000009337/ENSCSAVG00000004124/ENSCSAVG00000001943/ENSCSAVG00000002672/ENSCSAVG00000005308/ENSCSAVG00000002786/ENSCSAVG00000001404/novel.5827	-/-/-/-/-/-/-/-/-/-/-/-/-/-/-/-/-/-/-/-	20
BP	GO:0034655	nucleobase-containing compound catabolic process	7/513	16/3685	0.00356355	0.01438	ENSCSAVG00000010715/ENSCSAVG00000001409/ENSCSAVG00000010872/ENSCSAVG00000008344/ENSCSAVG00000010017/ENSCSAVG00000003815/ENSCSAVG00000000170	-/-/-/-/-/-/-	7
BP	GO:1902600	proton transmembrane transport	8/513	20/3685	0.0036072	0.0143869	ENSCSAVG00000000466/ENSCSAVG00000003350/ENSCSAVG00000009414/ENSCSAVG00000007278/ENSCSAVG00000000185/ENSCSAVG00000009170/novel.3395/ENSCSAVG00000010951	-/-/-/-/-/-/-/-	8
BP	GO:0034654	nucleobase-containing compound biosynthetic process	62/513	326/3685	0.00450682	0.0177683	ENSCSAVG00000003053/ENSCSAVG00000010715/ENSCSAVG00000009414/ENSCSAVG00000007278/ENSCSAVG00000000185/ENSCSAVG00000009170/ENSCSAVG00000001409/ENSCSAVG00000005696/novel.3395/ENSCSAVG00000010951/ENSCSAVG00000010872/ENSCSAVG00000011754/ENSCSAVG00000008100/ENSCSAVG00000004857/ENSCSAVG00000006332/ENSCSAVG00000005243/ENSCSAVG00000008344/ENSCSAVG00000006666/ENSCSAVG00000010433/ENSCSAVG00000000312/ENSCSAVG…	-/-/-/-/-/-/-/-/-/-/-/-/-/-/-/-/-/-/-/-/-/-/-/-/-/-/-/-/-/-/-/-/-/-/-/-/-/-/-/-/-/-/-/-/-/-/-/-/-/-/-/-/-/-/-/-/-/-/-/-/-/-	62
BP	GO:0016053	organic acid biosynthetic process	9/513	25/3685	0.00469494	0.018094	ENSCSAVG00000010715/ENSCSAVG00000000230/ENSCSAVG00000001409/ENSCSAVG00000010872/ENSCSAVG00000008344/ENSCSAVG00000003815/ENSCSAVG00000001584/novel.1585/novel.3427	-/-/-/-/-/-/-/-/-	9
BP	GO:0046394	carboxylic acid biosynthetic process	9/513	25/3685	0.00469494	0.018094	ENSCSAVG00000010715/ENSCSAVG00000000230/ENSCSAVG00000001409/ENSCSAVG00000010872/ENSCSAVG00000008344/ENSCSAVG00000003815/ENSCSAVG00000001584/novel.1585/novel.3427	-/-/-/-/-/-/-/-/-	9
BP	GO:0051726	regulation of cell cycle	6/513	13/3685	0.00509037	0.0194	ENSCSAVG00000001397/ENSCSAVG00000002240/ENSCSAVG00000006645/ENSCSAVG00000010169/ENSCSAVG00000005674/ENSCSAVG00000005137	-/-/-/-/-/-	6
BP	GO:0034660	ncRNA metabolic process	17/513	65/3685	0.00614926	0.023178	ENSCSAVG00000004438/ENSCSAVG00000004963/ENSCSAVG00000000894/ENSCSAVG00000001680/ENSCSAVG00000008757/ENSCSAVG00000000525/ENSCSAVG00000007684/ENSCSAVG00000011282/ENSCSAVG00000004773/ENSCSAVG00000006653/ENSCSAVG00000001943/ENSCSAVG00000002672/ENSCSAVG00000003621/ENSCSAVG00000005308/ENSCSAVG00000000521/ENSCSAVG00000001404/novel.5827	-/-/-/-/-/-/-/-/-/-/-/-/-/-/-/-/-	17
BP	GO:0019438	aromatic compound biosynthetic process	63/513	338/3685	0.00675598	0.0250453	ENSCSAVG00000003053/ENSCSAVG00000010715/ENSCSAVG00000009414/ENSCSAVG00000007278/ENSCSAVG00000000185/ENSCSAVG00000009170/ENSCSAVG00000001409/ENSCSAVG00000005696/novel.3395/ENSCSAVG00000010951/ENSCSAVG00000010872/ENSCSAVG00000011754/ENSCSAVG00000008100/ENSCSAVG00000004857/ENSCSAVG00000006332/ENSCSAVG00000005243/ENSCSAVG00000008344/ENSCSAVG00000006666/ENSCSAVG00000010433/ENSCSAVG00000000312/ENSCSAVG…	-/-/-/-/-/-/-/-/-/-/-/-/-/-/-/-/-/-/-/-/-/-/-/-/-/-/-/-/-/-/-/-/-/-/-/-/-/-/-/-/-/-/-/-/-/-/-/-/-/-/-/-/-/-/-/-/-/-/-/-/-/-/-	63
BP	GO:0006259	DNA metabolic process	23/513	98/3685	0.0067907	0.0250453	ENSCSAVG00000000937/ENSCSAVG00000007691/ENSCSAVG00000005488/ENSCSAVG00000008985/ENSCSAVG00000001702/ENSCSAVG00000000485/ENSCSAVG00000001447/ENSCSAVG00000002240/ENSCSAVG00000010166/ENSCSAVG00000007575/ENSCSAVG00000010725/ENSCSAVG00000001889/ENSCSAVG00000009251/ENSCSAVG00000010293/ENSCSAVG00000004767/ENSCSAVG00000006861/ENSCSAVG00000006632/ENSCSAVG00000007912/ENSCSAVG00000000445/ENSCSAVG00000000936…	-/-/-/-/-/-/-/-/-/-/-/-/-/-/-/-/-/-/-/-/-/-/-	23
BP	GO:0008033	tRNA processing	8/513	22/3685	0.00710047	0.0256364	ENSCSAVG00000004963/ENSCSAVG00000001680/ENSCSAVG00000008757/ENSCSAVG00000000525/ENSCSAVG00000011282/ENSCSAVG00000001943/ENSCSAVG00000005308/novel.5827	-/-/-/-/-/-/-/-	8
BP	GO:0009451	RNA modification	8/513	22/3685	0.00710047	0.0256364	ENSCSAVG00000006355/ENSCSAVG00000004963/ENSCSAVG00000001680/ENSCSAVG00000008757/ENSCSAVG00000000872/ENSCSAVG00000001943/ENSCSAVG00000003751/ENSCSAVG00000007812	-/-/-/-/-/-/-/-	8
BP	GO:0044270	cellular nitrogen compound catabolic process	7/513	18/3685	0.00771354	0.0271818	ENSCSAVG00000010715/ENSCSAVG00000001409/ENSCSAVG00000010872/ENSCSAVG00000008344/ENSCSAVG00000010017/ENSCSAVG00000003815/ENSCSAVG00000000170	-/-/-/-/-/-/-	7
BP	GO:0046700	heterocycle catabolic process	7/513	18/3685	0.00771354	0.0271818	ENSCSAVG00000010715/ENSCSAVG00000001409/ENSCSAVG00000010872/ENSCSAVG00000008344/ENSCSAVG00000010017/ENSCSAVG00000003815/ENSCSAVG00000000170	-/-/-/-/-/-/-	7
BP	GO:0022607	cellular component assembly	15/513	56/3685	0.00776624	0.0271818	ENSCSAVG00000002707/ENSCSAVG00000006648/ENSCSAVG00000004833/ENSCSAVG00000007935/novel.6857/ENSCSAVG00000004990/ENSCSAVG00000011555/ENSCSAVG00000001417/ENSCSAVG00000009303/ENSCSAVG00000005658/ENSCSAVG00000003966/ENSCSAVG00000011694/novel.5331/ENSCSAVG00000005058/novel.238	-/-/-/-/-/-/-/-/-/-/-/-/-/-/-	15
BP	GO:0065003	protein-containing complex assembly	13/513	46/3685	0.00798741	0.0276735	ENSCSAVG00000002707/ENSCSAVG00000006648/ENSCSAVG00000004833/ENSCSAVG00000007935/ENSCSAVG00000004990/ENSCSAVG00000001417/ENSCSAVG00000009303/ENSCSAVG00000005658/ENSCSAVG00000003966/ENSCSAVG00000011694/novel.5331/ENSCSAVG00000005058/novel.238	-/-/-/-/-/-/-/-/-/-/-/-/-	13
BP	GO:1901362	organic cyclic compound biosynthetic process	64/513	348/3685	0.00863788	0.0296279	ENSCSAVG00000003053/ENSCSAVG00000010715/ENSCSAVG00000009414/ENSCSAVG00000007278/ENSCSAVG00000000185/ENSCSAVG00000009170/ENSCSAVG00000001409/ENSCSAVG00000005696/novel.3395/ENSCSAVG00000010951/ENSCSAVG00000010872/ENSCSAVG00000011754/ENSCSAVG00000008100/ENSCSAVG00000004857/ENSCSAVG00000006332/ENSCSAVG00000005243/ENSCSAVG00000008344/ENSCSAVG00000006666/ENSCSAVG00000010433/ENSCSAVG00000000312/ENSCSAVG…	-/-/-/-/-/-/-/-/-/-/-/-/-/-/-/-/-/-/-/-/-/-/-/-/-/-/-/-/-/-/-/-/-/-/-/-/-/-/-/-/-/-/-/-/-/-/-/-/-/-/-/-/-/-/-/-/-/-/-/-/-/-/-/-	64
BP	GO:0018130	heterocycle biosynthetic process	63/513	345/3685	0.010716	0.0358944	ENSCSAVG00000003053/ENSCSAVG00000010715/ENSCSAVG00000009414/ENSCSAVG00000007278/ENSCSAVG00000000185/ENSCSAVG00000009170/ENSCSAVG00000001409/ENSCSAVG00000005696/novel.3395/ENSCSAVG00000010951/ENSCSAVG00000010872/ENSCSAVG00000011754/ENSCSAVG00000008100/ENSCSAVG00000004857/ENSCSAVG00000006332/ENSCSAVG00000005243/ENSCSAVG00000008344/ENSCSAVG00000006666/ENSCSAVG00000010433/ENSCSAVG00000000312/ENSCSAVG…	-/-/-/-/-/-/-/-/-/-/-/-/-/-/-/-/-/-/-/-/-/-/-/-/-/-/-/-/-/-/-/-/-/-/-/-/-/-/-/-/-/-/-/-/-/-/-/-/-/-/-/-/-/-/-/-/-/-/-/-/-/-/-	63
BP	GO:0019439	aromatic compound catabolic process	7/513	19/3685	0.0107788	0.0358944	ENSCSAVG00000010715/ENSCSAVG00000001409/ENSCSAVG00000010872/ENSCSAVG00000008344/ENSCSAVG00000010017/ENSCSAVG00000003815/ENSCSAVG00000000170	-/-/-/-/-/-/-	7
BP	GO:1901361	organic cyclic compound catabolic process	7/513	19/3685	0.0107788	0.0358944	ENSCSAVG00000010715/ENSCSAVG00000001409/ENSCSAVG00000010872/ENSCSAVG00000008344/ENSCSAVG00000010017/ENSCSAVG00000003815/ENSCSAVG00000000170	-/-/-/-/-/-/-	7
BP	GO:0019359	nicotinamide nucleotide biosynthetic process	5/513	11/3685	0.0114907	0.0375361	ENSCSAVG00000010715/ENSCSAVG00000001409/ENSCSAVG00000010872/ENSCSAVG00000008344/ENSCSAVG00000003815	-/-/-/-/-	5
BP	GO:0071103	DNA conformation change	5/513	11/3685	0.0114907	0.0375361	ENSCSAVG00000002707/ENSCSAVG00000000937/ENSCSAVG00000006648/ENSCSAVG00000003257/ENSCSAVG00000006829	-/-/-/-/-	5
BP	GO:0043933	protein-containing complex subunit organization	13/513	48/3685	0.0116413	0.0376694	ENSCSAVG00000002707/ENSCSAVG00000006648/ENSCSAVG00000004833/ENSCSAVG00000007935/ENSCSAVG00000004990/ENSCSAVG00000001417/ENSCSAVG00000009303/ENSCSAVG00000005658/ENSCSAVG00000003966/ENSCSAVG00000011694/novel.5331/ENSCSAVG00000005058/novel.238	-/-/-/-/-/-/-/-/-/-/-/-/-	13
BP	GO:0016070	RNA metabolic process	71/513	401/3685	0.0142097	0.0455509	ENSCSAVG00000003053/ENSCSAVG00000005696/ENSCSAVG00000008100/ENSCSAVG00000003919/ENSCSAVG00000006666/ENSCSAVG00000004438/ENSCSAVG00000010433/ENSCSAVG00000000312/ENSCSAVG00000010448/ENSCSAVG00000008629/ENSCSAVG00000006355/ENSCSAVG00000004963/ENSCSAVG00000007153/ENSCSAVG00000007935/ENSCSAVG00000004784/ENSCSAVG00000000894/ENSCSAVG00000001680/ENSCSAVG00000008334/ENSCSAVG00000008757/novel.1720/ENSCSAVG…	-/-/-/-/-/-/-/-/-/-/-/-/-/-/-/-/-/-/-/-/-/-/-/-/-/-/-/-/-/-/-/-/-/-/-/-/-/-/-/-/-/-/-/-/-/-/-/-/-/-/-/-/-/-/-/-/-/-/-/-/-/-/-/-/-/-/-/-/-/-/-	71
CC	GO:0044444	cytoplasmic part	81/297	225/1994	2.52061e-17	1.6384e-15	ENSCSAVG00000006343/ENSCSAVG00000010081/ENSCSAVG00000011609/ENSCSAVG00000010834/ENSCSAVG00000009726/ENSCSAVG00000008528/ENSCSAVG00000009906/ENSCSAVG00000006847/ENSCSAVG00000009697/ENSCSAVG00000000643/ENSCSAVG00000008472/ENSCSAVG00000007282/ENSCSAVG00000007330/ENSCSAVG00000001105/ENSCSAVG00000009125/ENSCSAVG00000003701/ENSCSAVG00000006147/novel.5094/ENSCSAVG00000000180/ENSCSAVG00000002209/ENSCSAVG…	-/-/-/-/-/-/-/-/-/-/-/-/-/-/-/-/-/-/-/-/-/-/-/-/-/-/-/-/-/-/-/-/-/-/-/-/-/-/-/-/-/-/-/-/-/-/-/-/-/-/-/-/-/-/-/-/-/-/-/-/-/-/-/-/-/-/-/-/-/-/-/-/-/-/-/-/-/-/-/-/-	81
CC	GO:0005737	cytoplasm	92/297	281/1994	1.25286e-16	4.07178e-15	ENSCSAVG00000006343/ENSCSAVG00000010081/ENSCSAVG00000011609/ENSCSAVG00000010834/ENSCSAVG00000009726/ENSCSAVG00000008528/ENSCSAVG00000009906/ENSCSAVG00000006847/ENSCSAVG00000009697/ENSCSAVG00000000643/ENSCSAVG00000008472/ENSCSAVG00000007282/ENSCSAVG00000007330/ENSCSAVG00000001105/ENSCSAVG00000009125/ENSCSAVG00000003701/ENSCSAVG00000006147/novel.5094/ENSCSAVG00000000180/ENSCSAVG00000002209/ENSCSAVG…	-/-/-/-/-/-/-/-/-/-/-/-/-/-/-/-/-/-/-/-/-/-/-/-/-/-/-/-/-/-/-/-/-/-/-/-/-/-/-/-/-/-/-/-/-/-/-/-/-/-/-/-/-/-/-/-/-/-/-/-/-/-/-/-/-/-/-/-/-/-/-/-/-/-/-/-/-/-/-/-/-/-/-/-/-/-/-/-/-/-/-/-	92
CC	GO:0032991	protein-containing complex	105/297	347/1994	2.27295e-16	4.92472e-15	ENSCSAVG00000006343/ENSCSAVG00000010081/ENSCSAVG00000000466/ENSCSAVG00000011609/ENSCSAVG00000010834/ENSCSAVG00000009726/ENSCSAVG00000008528/ENSCSAVG00000009906/ENSCSAVG00000006847/ENSCSAVG00000009697/ENSCSAVG00000000643/ENSCSAVG00000008472/ENSCSAVG00000007282/ENSCSAVG00000007330/ENSCSAVG00000001105/ENSCSAVG00000009125/ENSCSAVG00000003701/ENSCSAVG00000006147/novel.5094/ENSCSAVG00000002209/ENSCSAVG…	-/-/-/-/-/-/-/-/-/-/-/-/-/-/-/-/-/-/-/-/-/-/-/-/-/-/-/-/-/-/-/-/-/-/-/-/-/-/-/-/-/-/-/-/-/-/-/-/-/-/-/-/-/-/-/-/-/-/-/-/-/-/-/-/-/-/-/-/-/-/-/-/-/-/-/-/-/-/-/-/-/-/-/-/-/-/-/-/-/-/-/-/-/-/-/-/-/-/-/-/-/-/-/-/-	105
CC	GO:0005840	ribosome	41/297	79/1994	2.80001e-15	4.55001e-14	ENSCSAVG00000006343/ENSCSAVG00000010081/ENSCSAVG00000011609/ENSCSAVG00000010834/ENSCSAVG00000009726/ENSCSAVG00000008528/ENSCSAVG00000009906/ENSCSAVG00000006847/ENSCSAVG00000009697/ENSCSAVG00000000643/ENSCSAVG00000008472/ENSCSAVG00000007282/ENSCSAVG00000007330/ENSCSAVG00000001105/ENSCSAVG00000009125/ENSCSAVG00000003701/ENSCSAVG00000006147/novel.5094/ENSCSAVG00000002209/ENSCSAVG00000001293/ENSCSAVG…	-/-/-/-/-/-/-/-/-/-/-/-/-/-/-/-/-/-/-/-/-/-/-/-/-/-/-/-/-/-/-/-/-/-/-/-/-/-/-/-/-	41
CC	GO:1990904	ribonucleoprotein complex	45/297	96/1994	1.49963e-14	1.94952e-13	ENSCSAVG00000006343/ENSCSAVG00000010081/ENSCSAVG00000011609/ENSCSAVG00000010834/ENSCSAVG00000009726/ENSCSAVG00000008528/ENSCSAVG00000009906/ENSCSAVG00000006847/ENSCSAVG00000009697/ENSCSAVG00000000643/ENSCSAVG00000008472/ENSCSAVG00000007282/ENSCSAVG00000007330/ENSCSAVG00000001105/ENSCSAVG00000009125/ENSCSAVG00000003701/ENSCSAVG00000006147/novel.5094/ENSCSAVG00000002209/ENSCSAVG00000001293/ENSCSAVG…	-/-/-/-/-/-/-/-/-/-/-/-/-/-/-/-/-/-/-/-/-/-/-/-/-/-/-/-/-/-/-/-/-/-/-/-/-/-/-/-/-/-/-/-/-	45
CC	GO:0005739	mitochondrion	26/297	40/1994	3.7975e-13	4.11396e-12	ENSCSAVG00000000180/ENSCSAVG00000010391/novel.256/ENSCSAVG00000000929/ENSCSAVG00000009170/ENSCSAVG00000001223/ENSCSAVG00000004192/novel.3395/ENSCSAVG00000010326/ENSCSAVG00000011011/ENSCSAVG00000004194/ENSCSAVG00000011509/ENSCSAVG00000008552/ENSCSAVG00000008143/ENSCSAVG00000001187/ENSCSAVG00000003978/novel.6866/ENSCSAVG00000006271/ENSCSAVG00000011092/novel.2716/ENSCSAVG00000006386/ENSCSAVG00000004…	-/-/-/-/-/-/-/-/-/-/-/-/-/-/-/-/-/-/-/-/-/-/-/-/-/-	26
CC	GO:0043231	intracellular membrane-bounded organelle	95/297	345/1994	9.45174e-12	8.77661e-11	ENSCSAVG00000000180/ENSCSAVG00000010391/novel.256/ENSCSAVG00000000929/ENSCSAVG00000009170/ENSCSAVG00000001223/ENSCSAVG00000004192/novel.3395/ENSCSAVG00000008864/ENSCSAVG00000010326/ENSCSAVG00000011011/ENSCSAVG00000004194/ENSCSAVG00000002707/ENSCSAVG00000011509/ENSCSAVG00000003724/ENSCSAVG00000000768/ENSCSAVG00000008552/ENSCSAVG00000000476/ENSCSAVG00000008143/ENSCSAVG00000003598/ENSCSAVG0000001024…	-/-/-/-/-/-/-/-/-/-/-/-/-/-/-/-/-/-/-/-/-/-/-/-/-/-/-/-/-/-/-/-/-/-/-/-/-/-/-/-/-/-/-/-/-/-/-/-/-/-/-/-/-/-/-/-/-/-/-/-/-/-/-/-/-/-/-/-/-/-/-/-/-/-/-/-/-/-/-/-/-/-/-/-/-/-/-/-/-/-/-/-/-/-/-	95
CC	GO:0043227	membrane-bounded organelle	95/297	349/1994	2.0305e-11	1.64978e-10	ENSCSAVG00000000180/ENSCSAVG00000010391/novel.256/ENSCSAVG00000000929/ENSCSAVG00000009170/ENSCSAVG00000001223/ENSCSAVG00000004192/novel.3395/ENSCSAVG00000008864/ENSCSAVG00000010326/ENSCSAVG00000011011/ENSCSAVG00000004194/ENSCSAVG00000002707/ENSCSAVG00000011509/ENSCSAVG00000003724/ENSCSAVG00000000768/ENSCSAVG00000008552/ENSCSAVG00000000476/ENSCSAVG00000008143/ENSCSAVG00000003598/ENSCSAVG0000001024…	-/-/-/-/-/-/-/-/-/-/-/-/-/-/-/-/-/-/-/-/-/-/-/-/-/-/-/-/-/-/-/-/-/-/-/-/-/-/-/-/-/-/-/-/-/-/-/-/-/-/-/-/-/-/-/-/-/-/-/-/-/-/-/-/-/-/-/-/-/-/-/-/-/-/-/-/-/-/-/-/-/-/-/-/-/-/-/-/-/-/-/-/-/-/-	95
CC	GO:0005839	proteasome core complex	11/297	11/1994	6.82267e-10	4.92749e-09	ENSCSAVG00000005078/ENSCSAVG00000007029/ENSCSAVG00000001392/ENSCSAVG00000011135/ENSCSAVG00000003542/ENSCSAVG00000000720/ENSCSAVG00000008740/ENSCSAVG00000010631/ENSCSAVG00000009761/ENSCSAVG00000005269/ENSCSAVG00000000219	-/-/-/-/-/-/-/-/-/-/-	11
CC	GO:0043228	non-membrane-bounded organelle	61/297	197/1994	9.76048e-10	5.76756e-09	ENSCSAVG00000006343/ENSCSAVG00000010081/ENSCSAVG00000011609/ENSCSAVG00000010834/ENSCSAVG00000009726/ENSCSAVG00000008528/ENSCSAVG00000009906/ENSCSAVG00000006847/ENSCSAVG00000009697/ENSCSAVG00000000643/ENSCSAVG00000008472/ENSCSAVG00000007282/ENSCSAVG00000007330/ENSCSAVG00000001105/ENSCSAVG00000009125/ENSCSAVG00000003701/ENSCSAVG00000006147/novel.5094/ENSCSAVG00000002209/ENSCSAVG00000001293/ENSCSAVG…	-/-/-/-/-/-/-/-/-/-/-/-/-/-/-/-/-/-/-/-/-/-/-/-/-/-/-/-/-/-/-/-/-/-/-/-/-/-/-/-/-/-/-/-/-/-/-/-/-/-/-/-/-/-/-/-/-/-/-/-/-	61
CC	GO:0043232	intracellular non-membrane-bounded organelle	61/297	197/1994	9.76048e-10	5.76756e-09	ENSCSAVG00000006343/ENSCSAVG00000010081/ENSCSAVG00000011609/ENSCSAVG00000010834/ENSCSAVG00000009726/ENSCSAVG00000008528/ENSCSAVG00000009906/ENSCSAVG00000006847/ENSCSAVG00000009697/ENSCSAVG00000000643/ENSCSAVG00000008472/ENSCSAVG00000007282/ENSCSAVG00000007330/ENSCSAVG00000001105/ENSCSAVG00000009125/ENSCSAVG00000003701/ENSCSAVG00000006147/novel.5094/ENSCSAVG00000002209/ENSCSAVG00000001293/ENSCSAVG…	-/-/-/-/-/-/-/-/-/-/-/-/-/-/-/-/-/-/-/-/-/-/-/-/-/-/-/-/-/-/-/-/-/-/-/-/-/-/-/-/-/-/-/-/-/-/-/-/-/-/-/-/-/-/-/-/-/-/-/-/-	61
CC	GO:0044429	mitochondrial part	17/297	29/1994	5.43879e-08	2.94601e-07	ENSCSAVG00000000180/ENSCSAVG00000010391/ENSCSAVG00000000929/ENSCSAVG00000009170/ENSCSAVG00000001223/novel.3395/ENSCSAVG00000011509/ENSCSAVG00000008552/ENSCSAVG00000008143/ENSCSAVG00000001187/ENSCSAVG00000003978/novel.6866/ENSCSAVG00000006271/ENSCSAVG00000011092/novel.2716/novel.6004/ENSCSAVG00000009623	-/-/-/-/-/-/-/-/-/-/-/-/-/-/-/-/-	17
CC	GO:0000502	proteasome complex	12/297	16/1994	1.01359e-07	4.70598e-07	ENSCSAVG00000005078/ENSCSAVG00000007029/ENSCSAVG00000001392/ENSCSAVG00000011135/ENSCSAVG00000003542/ENSCSAVG00000000720/ENSCSAVG00000008740/ENSCSAVG00000010631/ENSCSAVG00000009761/ENSCSAVG00000005269/ENSCSAVG00000009758/ENSCSAVG00000000219	-/-/-/-/-/-/-/-/-/-/-/-	12
CC	GO:1905369	endopeptidase complex	12/297	16/1994	1.01359e-07	4.70598e-07	ENSCSAVG00000005078/ENSCSAVG00000007029/ENSCSAVG00000001392/ENSCSAVG00000011135/ENSCSAVG00000003542/ENSCSAVG00000000720/ENSCSAVG00000008740/ENSCSAVG00000010631/ENSCSAVG00000009761/ENSCSAVG00000005269/ENSCSAVG00000009758/ENSCSAVG00000000219	-/-/-/-/-/-/-/-/-/-/-/-	12
CC	GO:1905368	peptidase complex	13/297	19/1994	1.63047e-07	7.06536e-07	ENSCSAVG00000005078/ENSCSAVG00000007029/ENSCSAVG00000001392/ENSCSAVG00000011135/ENSCSAVG00000003542/ENSCSAVG00000000720/ENSCSAVG00000000768/ENSCSAVG00000008740/ENSCSAVG00000010631/ENSCSAVG00000009761/ENSCSAVG00000005269/ENSCSAVG00000009758/ENSCSAVG00000000219	-/-/-/-/-/-/-/-/-/-/-/-/-	13
CC	GO:0031966	mitochondrial membrane	13/297	21/1994	9.19618e-07	3.64017e-06	ENSCSAVG00000000180/ENSCSAVG00000010391/ENSCSAVG00000000929/ENSCSAVG00000009170/ENSCSAVG00000001223/novel.3395/ENSCSAVG00000011509/ENSCSAVG00000008552/ENSCSAVG00000008143/ENSCSAVG00000001187/ENSCSAVG00000006271/novel.2716/novel.6004	-/-/-/-/-/-/-/-/-/-/-/-/-	13
CC	GO:0005740	mitochondrial envelope	14/297	24/1994	9.52045e-07	3.64017e-06	ENSCSAVG00000000180/ENSCSAVG00000010391/ENSCSAVG00000000929/ENSCSAVG00000009170/ENSCSAVG00000001223/novel.3395/ENSCSAVG00000011509/ENSCSAVG00000008552/ENSCSAVG00000008143/ENSCSAVG00000001187/novel.6866/ENSCSAVG00000006271/novel.2716/novel.6004	-/-/-/-/-/-/-/-/-/-/-/-/-/-	14
CC	GO:0005634	nucleus	59/297	231/1994	4.3136e-06	1.55769e-05	ENSCSAVG00000008864/ENSCSAVG00000002707/ENSCSAVG00000003724/ENSCSAVG00000000476/ENSCSAVG00000006648/ENSCSAVG00000010339/ENSCSAVG00000006666/ENSCSAVG00000010433/ENSCSAVG00000010517/ENSCSAVG00000009079/ENSCSAVG00000005714/ENSCSAVG00000006869/ENSCSAVG00000008629/ENSCSAVG00000008985/ENSCSAVG00000004191/ENSCSAVG00000001702/ENSCSAVG00000007935/ENSCSAVG00000005210/ENSCSAVG00000009889/ENSCSAVG00000001875…	-/-/-/-/-/-/-/-/-/-/-/-/-/-/-/-/-/-/-/-/-/-/-/-/-/-/-/-/-/-/-/-/-/-/-/-/-/-/-/-/-/-/-/-/-/-/-/-/-/-/-/-/-/-/-/-/-/-/-	59
CC	GO:0031967	organelle envelope	15/297	32/1994	1.43864e-05	4.67558e-05	ENSCSAVG00000000180/ENSCSAVG00000010391/ENSCSAVG00000000929/ENSCSAVG00000009170/ENSCSAVG00000001223/novel.3395/ENSCSAVG00000011509/ENSCSAVG00000008552/ENSCSAVG00000008143/ENSCSAVG00000001187/novel.6866/ENSCSAVG00000006271/novel.2716/novel.6004/ENSCSAVG00000005581	-/-/-/-/-/-/-/-/-/-/-/-/-/-/-	15
CC	GO:0031975	envelope	15/297	32/1994	1.43864e-05	4.67558e-05	ENSCSAVG00000000180/ENSCSAVG00000010391/ENSCSAVG00000000929/ENSCSAVG00000009170/ENSCSAVG00000001223/novel.3395/ENSCSAVG00000011509/ENSCSAVG00000008552/ENSCSAVG00000008143/ENSCSAVG00000001187/novel.6866/ENSCSAVG00000006271/novel.2716/novel.6004/ENSCSAVG00000005581	-/-/-/-/-/-/-/-/-/-/-/-/-/-/-	15
CC	GO:1902494	catalytic complex	26/297	77/1994	1.88703e-05	5.84081e-05	ENSCSAVG00000001409/ENSCSAVG00000005078/ENSCSAVG00000007029/ENSCSAVG00000001392/ENSCSAVG00000011135/ENSCSAVG00000003542/ENSCSAVG00000000720/ENSCSAVG00000000768/ENSCSAVG00000008740/ENSCSAVG00000010631/ENSCSAVG00000009761/ENSCSAVG00000005269/ENSCSAVG00000009758/ENSCSAVG00000008629/ENSCSAVG00000003815/ENSCSAVG00000000219/ENSCSAVG00000001680/ENSCSAVG00000010865/ENSCSAVG00000002900/ENSCSAVG00000010169…	-/-/-/-/-/-/-/-/-/-/-/-/-/-/-/-/-/-/-/-/-/-/-/-/-/-	26
CC	GO:0005743	mitochondrial inner membrane	9/297	15/1994	7.04463e-05	0.000199087	ENSCSAVG00000000180/ENSCSAVG00000010391/ENSCSAVG00000009170/ENSCSAVG00000001223/novel.3395/ENSCSAVG00000008552/ENSCSAVG00000008143/ENSCSAVG00000001187/novel.2716	-/-/-/-/-/-/-/-/-	9
CC	GO:0019866	organelle inner membrane	9/297	15/1994	7.04463e-05	0.000199087	ENSCSAVG00000000180/ENSCSAVG00000010391/ENSCSAVG00000009170/ENSCSAVG00000001223/novel.3395/ENSCSAVG00000008552/ENSCSAVG00000008143/ENSCSAVG00000001187/novel.2716	-/-/-/-/-/-/-/-/-	9
CC	GO:0044446	intracellular organelle part	53/297	223/1994	0.00013024	0.000352735	ENSCSAVG00000006147/ENSCSAVG00000000180/ENSCSAVG00000001293/ENSCSAVG00000010391/ENSCSAVG00000000929/ENSCSAVG00000009170/ENSCSAVG00000001223/novel.3395/ENSCSAVG00000011509/ENSCSAVG00000000768/ENSCSAVG00000008552/ENSCSAVG00000008143/ENSCSAVG00000006666/ENSCSAVG00000001187/ENSCSAVG00000004099/ENSCSAVG00000003698/ENSCSAVG00000006869/ENSCSAVG00000008629/ENSCSAVG00000003978/novel.6866/ENSCSAVG000000094…	-/-/-/-/-/-/-/-/-/-/-/-/-/-/-/-/-/-/-/-/-/-/-/-/-/-/-/-/-/-/-/-/-/-/-/-/-/-/-/-/-/-/-/-/-/-/-/-/-/-/-/-/-	53
CC	GO:0044422	organelle part	53/297	225/1994	0.000167927	0.00043661	ENSCSAVG00000006147/ENSCSAVG00000000180/ENSCSAVG00000001293/ENSCSAVG00000010391/ENSCSAVG00000000929/ENSCSAVG00000009170/ENSCSAVG00000001223/novel.3395/ENSCSAVG00000011509/ENSCSAVG00000000768/ENSCSAVG00000008552/ENSCSAVG00000008143/ENSCSAVG00000006666/ENSCSAVG00000001187/ENSCSAVG00000004099/ENSCSAVG00000003698/ENSCSAVG00000006869/ENSCSAVG00000008629/ENSCSAVG00000003978/novel.6866/ENSCSAVG000000094…	-/-/-/-/-/-/-/-/-/-/-/-/-/-/-/-/-/-/-/-/-/-/-/-/-/-/-/-/-/-/-/-/-/-/-/-/-/-/-/-/-/-/-/-/-/-/-/-/-/-/-/-/-	53
CC	GO:0031974	membrane-enclosed lumen	16/297	45/1994	0.000420133	0.000975308	ENSCSAVG00000006666/ENSCSAVG00000006869/ENSCSAVG00000008629/ENSCSAVG00000003978/novel.6866/ENSCSAVG00000011092/ENSCSAVG00000002240/ENSCSAVG00000009956/ENSCSAVG00000009623/ENSCSAVG00000003340/ENSCSAVG00000000211/ENSCSAVG00000004939/ENSCSAVG00000011717/ENSCSAVG00000001191/ENSCSAVG00000010502/ENSCSAVG00000001404	-/-/-/-/-/-/-/-/-/-/-/-/-/-/-/-	16
CC	GO:0043233	organelle lumen	16/297	45/1994	0.000420133	0.000975308	ENSCSAVG00000006666/ENSCSAVG00000006869/ENSCSAVG00000008629/ENSCSAVG00000003978/novel.6866/ENSCSAVG00000011092/ENSCSAVG00000002240/ENSCSAVG00000009956/ENSCSAVG00000009623/ENSCSAVG00000003340/ENSCSAVG00000000211/ENSCSAVG00000004939/ENSCSAVG00000011717/ENSCSAVG00000001191/ENSCSAVG00000010502/ENSCSAVG00000001404	-/-/-/-/-/-/-/-/-/-/-/-/-/-/-/-	16
CC	GO:0070013	intracellular organelle lumen	16/297	45/1994	0.000420133	0.000975308	ENSCSAVG00000006666/ENSCSAVG00000006869/ENSCSAVG00000008629/ENSCSAVG00000003978/novel.6866/ENSCSAVG00000011092/ENSCSAVG00000002240/ENSCSAVG00000009956/ENSCSAVG00000009623/ENSCSAVG00000003340/ENSCSAVG00000000211/ENSCSAVG00000004939/ENSCSAVG00000011717/ENSCSAVG00000001191/ENSCSAVG00000010502/ENSCSAVG00000001404	-/-/-/-/-/-/-/-/-/-/-/-/-/-/-/-	16
CC	GO:0005694	chromosome	11/297	28/1994	0.0013352	0.00299268	ENSCSAVG00000000937/ENSCSAVG00000006869/ENSCSAVG00000005597/ENSCSAVG00000000485/ENSCSAVG00000009889/ENSCSAVG00000002240/ENSCSAVG00000006632/ENSCSAVG00000010255/ENSCSAVG00000003257/novel.238/ENSCSAVG00000006829	-/-/-/-/-/-/-/-/-/-/-	11
CC	GO:0044428	nuclear part	18/297	59/1994	0.0015047	0.00326018	ENSCSAVG00000006666/ENSCSAVG00000006869/ENSCSAVG00000008629/ENSCSAVG00000007935/ENSCSAVG00000002240/ENSCSAVG00000004990/ENSCSAVG00000010169/ENSCSAVG00000009956/ENSCSAVG00000003340/ENSCSAVG00000000211/ENSCSAVG00000004939/ENSCSAVG00000011717/ENSCSAVG00000005581/ENSCSAVG00000001191/ENSCSAVG00000000936/ENSCSAVG00000010502/ENSCSAVG00000005137/ENSCSAVG00000001404	-/-/-/-/-/-/-/-/-/-/-/-/-/-/-/-/-/-	18
CC	GO:1990234	transferase complex	9/297	24/1994	0.0053132	0.0111406	ENSCSAVG00000008629/ENSCSAVG00000001680/ENSCSAVG00000010169/ENSCSAVG00000003340/ENSCSAVG00000000211/ENSCSAVG00000011717/ENSCSAVG00000010502/ENSCSAVG00000005137/novel.3974	-/-/-/-/-/-/-/-/-	9
CC	GO:0098798	mitochondrial protein complex	6/297	13/1994	0.00707735	0.0143759	ENSCSAVG00000010391/ENSCSAVG00000009170/novel.3395/ENSCSAVG00000003978/novel.6004/ENSCSAVG00000009623	-/-/-/-/-/-	6
CC	GO:0044427	chromosomal part	7/297	17/1994	0.00769591	0.0151586	ENSCSAVG00000000485/ENSCSAVG00000009889/ENSCSAVG00000002240/ENSCSAVG00000006632/ENSCSAVG00000010255/ENSCSAVG00000003257/novel.238	-/-/-/-/-/-/-	7
CC	GO:0031981	nuclear lumen	12/297	39/1994	0.00851423	0.0162772	ENSCSAVG00000006666/ENSCSAVG00000006869/ENSCSAVG00000008629/ENSCSAVG00000002240/ENSCSAVG00000009956/ENSCSAVG00000003340/ENSCSAVG00000000211/ENSCSAVG00000004939/ENSCSAVG00000011717/ENSCSAVG00000001191/ENSCSAVG00000010502/ENSCSAVG00000001404	-/-/-/-/-/-/-/-/-/-/-/-	12
CC	GO:0030880	RNA polymerase complex	5/297	10/1994	0.00939504	0.0169633	ENSCSAVG00000008629/ENSCSAVG00000003340/ENSCSAVG00000011717/ENSCSAVG00000010502/novel.3974	-/-/-/-/-	5
CC	GO:0044455	mitochondrial membrane part	5/297	10/1994	0.00939504	0.0169633	ENSCSAVG00000010391/ENSCSAVG00000009170/novel.3395/ENSCSAVG00000008552/novel.6004	-/-/-/-/-	5
CC	GO:0031090	organelle membrane	13/297	46/1994	0.0134635	0.0236522	ENSCSAVG00000000180/ENSCSAVG00000010391/ENSCSAVG00000000929/ENSCSAVG00000009170/ENSCSAVG00000001223/novel.3395/ENSCSAVG00000011509/ENSCSAVG00000008552/ENSCSAVG00000008143/ENSCSAVG00000001187/ENSCSAVG00000006271/novel.2716/novel.6004	-/-/-/-/-/-/-/-/-/-/-/-/-	13
CC	GO:0005654	nucleoplasm	9/297	28/1994	0.0162594	0.027099	ENSCSAVG00000006666/ENSCSAVG00000008629/ENSCSAVG00000009956/ENSCSAVG00000003340/ENSCSAVG00000000211/ENSCSAVG00000004939/ENSCSAVG00000011717/ENSCSAVG00000001191/ENSCSAVG00000010502	-/-/-/-/-/-/-/-/-	9
CC	GO:0044451	nucleoplasm part	9/297	28/1994	0.0162594	0.027099	ENSCSAVG00000006666/ENSCSAVG00000008629/ENSCSAVG00000009956/ENSCSAVG00000003340/ENSCSAVG00000000211/ENSCSAVG00000004939/ENSCSAVG00000011717/ENSCSAVG00000001191/ENSCSAVG00000010502	-/-/-/-/-/-/-/-/-	9
CC	GO:0061695	transferase complex, transferring phosphorus-containing groups	5/297	12/1994	0.0228784	0.0371774	ENSCSAVG00000008629/ENSCSAVG00000003340/ENSCSAVG00000011717/ENSCSAVG00000010502/novel.3974	-/-/-/-/-	5
MF	GO:0003735	structural constituent of ribosome	40/783	77/5912	3.08832e-16	6.73254e-14	ENSCSAVG00000006343/ENSCSAVG00000010081/ENSCSAVG00000011609/ENSCSAVG00000010834/ENSCSAVG00000009726/ENSCSAVG00000008528/ENSCSAVG00000009906/ENSCSAVG00000006847/ENSCSAVG00000009697/ENSCSAVG00000000643/ENSCSAVG00000008472/ENSCSAVG00000007282/ENSCSAVG00000007330/ENSCSAVG00000001105/ENSCSAVG00000009125/ENSCSAVG00000003701/ENSCSAVG00000006147/novel.5094/ENSCSAVG00000002209/ENSCSAVG00000001293/ENSCSAVG…	-/-/-/-/-/-/-/-/-/-/-/-/-/-/-/-/-/-/-/-/-/-/-/-/-/-/-/-/-/-/-/-/-/-/-/-/-/-/-/-	40
MF	GO:0005198	structural molecule activity	40/783	99/5912	1.07508e-11	1.17184e-09	ENSCSAVG00000006343/ENSCSAVG00000010081/ENSCSAVG00000011609/ENSCSAVG00000010834/ENSCSAVG00000009726/ENSCSAVG00000008528/ENSCSAVG00000009906/ENSCSAVG00000006847/ENSCSAVG00000009697/ENSCSAVG00000000643/ENSCSAVG00000008472/ENSCSAVG00000007282/ENSCSAVG00000007330/ENSCSAVG00000001105/ENSCSAVG00000009125/ENSCSAVG00000003701/ENSCSAVG00000006147/novel.5094/ENSCSAVG00000002209/ENSCSAVG00000001293/ENSCSAVG…	-/-/-/-/-/-/-/-/-/-/-/-/-/-/-/-/-/-/-/-/-/-/-/-/-/-/-/-/-/-/-/-/-/-/-/-/-/-/-/-	40
MF	GO:0004298	threonine-type endopeptidase activity	11/783	11/5912	2.06871e-10	1.12745e-08	ENSCSAVG00000005078/ENSCSAVG00000007029/ENSCSAVG00000001392/ENSCSAVG00000011135/ENSCSAVG00000003542/ENSCSAVG00000000720/ENSCSAVG00000008740/ENSCSAVG00000010631/ENSCSAVG00000009761/ENSCSAVG00000005269/ENSCSAVG00000000219	-/-/-/-/-/-/-/-/-/-/-	11
MF	GO:0070003	threonine-type peptidase activity	11/783	11/5912	2.06871e-10	1.12745e-08	ENSCSAVG00000005078/ENSCSAVG00000007029/ENSCSAVG00000001392/ENSCSAVG00000011135/ENSCSAVG00000003542/ENSCSAVG00000000720/ENSCSAVG00000008740/ENSCSAVG00000010631/ENSCSAVG00000009761/ENSCSAVG00000005269/ENSCSAVG00000000219	-/-/-/-/-/-/-/-/-/-/-	11
MF	GO:0016651	oxidoreductase activity, acting on NAD(P)H	10/783	13/5912	3.0895e-07	1.34702e-05	novel.5566/ENSCSAVG00000006827/ENSCSAVG00000001223/ENSCSAVG00000004192/ENSCSAVG00000010326/ENSCSAVG00000011011/ENSCSAVG00000008474/ENSCSAVG00000005069/ENSCSAVG00000005526/ENSCSAVG00000001187	-/-/-/-/-/-/-/-/-/-	10
MF	GO:0008135	translation factor activity, RNA binding	11/783	20/5912	1.10505e-05	0.000401501	ENSCSAVG00000011014/ENSCSAVG00000008435/ENSCSAVG00000008729/ENSCSAVG00000002927/ENSCSAVG00000007722/ENSCSAVG00000011706/ENSCSAVG00000004949/ENSCSAVG00000001450/ENSCSAVG00000008066/ENSCSAVG00000007532/ENSCSAVG00000003021	-/-/-/-/-/-/-/-/-/-/-	11
MF	GO:0046982	protein heterodimerization activity	16/783	42/5912	4.45239e-05	0.0013866	ENSCSAVG00000009090/ENSCSAVG00000000312/ENSCSAVG00000011321/ENSCSAVG00000008629/ENSCSAVG00000007933/ENSCSAVG00000001053/ENSCSAVG00000004691/ENSCSAVG00000000527/ENSCSAVG00000001587/ENSCSAVG00000010307/ENSCSAVG00000010130/ENSCSAVG00000001590/ENSCSAVG00000010080/ENSCSAVG00000010087/ENSCSAVG00000007927/ENSCSAVG00000007936	-/-/-/-/-/-/-/-/-/-/-/-/-/-/-/-	16
MF	GO:0003743	translation initiation factor activity	8/783	14/5912	0.000131307	0.00357811	ENSCSAVG00000008435/ENSCSAVG00000008729/ENSCSAVG00000011706/ENSCSAVG00000004949/ENSCSAVG00000001450/ENSCSAVG00000008066/ENSCSAVG00000007532/ENSCSAVG00000003021	-/-/-/-/-/-/-/-	8
MF	GO:0009055	electron transfer activity	9/783	22/5912	0.00118723	0.0287573	novel.5566/ENSCSAVG00000000180/ENSCSAVG00000010391/ENSCSAVG00000007644/ENSCSAVG00000006827/ENSCSAVG00000010806/ENSCSAVG00000005069/ENSCSAVG00000006868/ENSCSAVG00000008689	-/-/-/-/-/-/-/-/-	9
MF	GO:0003723	RNA binding	28/783	119/5912	0.00142617	0.0310906	ENSCSAVG00000001105/ENSCSAVG00000011014/ENSCSAVG00000008435/ENSCSAVG00000008729/ENSCSAVG00000002927/ENSCSAVG00000007722/ENSCSAVG00000011706/ENSCSAVG00000004949/ENSCSAVG00000009055/ENSCSAVG00000001450/ENSCSAVG00000006636/ENSCSAVG00000008066/ENSCSAVG00000005603/ENSCSAVG00000004191/ENSCSAVG00000007935/ENSCSAVG00000010865/novel.5141/ENSCSAVG00000003684/ENSCSAVG00000007532/ENSCSAVG00000000698/ENSCSAVG…	-/-/-/-/-/-/-/-/-/-/-/-/-/-/-/-/-/-/-/-/-/-/-/-/-/-/-/-	28
MF	GO:0004518	nuclease activity	11/783	33/5912	0.00248077	0.0491644	ENSCSAVG00000006636/ENSCSAVG00000011217/ENSCSAVG00000000894/ENSCSAVG00000010166/ENSCSAVG00000000170/ENSCSAVG00000008584/ENSCSAVG00000010293/ENSCSAVG00000011282/ENSCSAVG00000010365/ENSCSAVG00000002786/novel.5827	-/-/-/-/-/-/-/-/-/-/-	11

## Sheet: Table S3
Cluster3_Goenrich_significant
Category	GOID	Description	GeneRatio	BgRatio	pvalue	padj	geneID	geneName	Count
BP	GO:0006259	DNA metabolic process	35/343	98/3685	3.21177e-13	9.73166e-11	ENSCSAVG00000002161/ENSCSAVG00000011569/ENSCSAVG00000002921/ENSCSAVG00000006597/ENSCSAVG00000010450/ENSCSAVG00000005216/ENSCSAVG00000011317/ENSCSAVG00000000726/ENSCSAVG00000009341/ENSCSAVG00000002121/ENSCSAVG00000006205/ENSCSAVG00000004243/ENSCSAVG00000001364/ENSCSAVG00000010888/ENSCSAVG00000011814/ENSCSAVG00000005742/ENSCSAVG00000009071/ENSCSAVG00000002950/novel.6011/ENSCSAVG00000007728/ENSCSAVG…	-/-/-/-/-/-/-/-/-/-/-/-/-/-/-/-/-/-/-/-/-/-/-/-/-/-/-/-/-/-/-/-/-/-/-	35
BP	GO:0006260	DNA replication	16/343	34/3685	1.04809e-08	1.58786e-06	ENSCSAVG00000005216/ENSCSAVG00000011317/ENSCSAVG00000000726/ENSCSAVG00000002121/ENSCSAVG00000006205/ENSCSAVG00000004243/ENSCSAVG00000010888/ENSCSAVG00000011814/ENSCSAVG00000005742/ENSCSAVG00000009071/ENSCSAVG00000001003/ENSCSAVG00000009075/ENSCSAVG00000004552/ENSCSAVG00000008863/ENSCSAVG00000003804/ENSCSAVG00000006989	-/-/-/-/-/-/-/-/-/-/-/-/-/-/-/-	16
BP	GO:0090304	nucleic acid metabolic process	75/343	496/3685	4.63637e-06	0.000468274	ENSCSAVG00000007408/novel.3550/ENSCSAVG00000002667/ENSCSAVG00000002161/ENSCSAVG00000011569/ENSCSAVG00000006462/ENSCSAVG00000010669/ENSCSAVG00000007392/ENSCSAVG00000002921/ENSCSAVG00000006597/ENSCSAVG00000004837/ENSCSAVG00000010450/novel.191/ENSCSAVG00000005216/ENSCSAVG00000011317/ENSCSAVG00000000726/ENSCSAVG00000009535/ENSCSAVG00000009341/ENSCSAVG00000002121/ENSCSAVG00000006205/ENSCSAVG0000000310…	-/-/-/-/-/-/-/-/-/-/-/-/-/-/-/-/-/-/-/-/-/-/-/-/-/-/-/-/-/-/-/-/-/-/-/-/-/-/-/-/-/-/-/-/-/-/-/-/-/-/-/-/-/-/-/-/-/-/-/-/-/-/-/-/-/-/-/-/-/-/-/-/-/-/-	75
BP	GO:0007017	microtubule-based process	18/343	63/3685	9.13968e-06	0.000597608	ENSCSAVG00000004570/ENSCSAVG00000010617/ENSCSAVG00000002169/ENSCSAVG00000005324/ENSCSAVG00000007178/ENSCSAVG00000006238/ENSCSAVG00000010315/ENSCSAVG00000004560/ENSCSAVG00000008499/ENSCSAVG00000004628/ENSCSAVG00000001454/ENSCSAVG00000010314/ENSCSAVG00000003091/ENSCSAVG00000006750/novel.1690/ENSCSAVG00000005545/ENSCSAVG00000001334/novel.1715	-/-/-/-/-/-/-/-/-/-/-/-/-/-/-/-/-/-	18
BP	GO:0006974	cellular response to DNA damage stimulus	15/343	47/3685	1.18338e-05	0.000597608	ENSCSAVG00000002161/ENSCSAVG00000011569/ENSCSAVG00000002921/ENSCSAVG00000009341/ENSCSAVG00000000975/ENSCSAVG00000001364/ENSCSAVG00000002950/ENSCSAVG00000002104/ENSCSAVG00000011245/ENSCSAVG00000008863/ENSCSAVG00000009651/ENSCSAVG00000010148/ENSCSAVG00000004080/novel.2106/novel.4805	-/-/-/-/-/-/-/-/-/-/-/-/-/-/-	15
BP	GO:0033554	cellular response to stress	15/343	47/3685	1.18338e-05	0.000597608	ENSCSAVG00000002161/ENSCSAVG00000011569/ENSCSAVG00000002921/ENSCSAVG00000009341/ENSCSAVG00000000975/ENSCSAVG00000001364/ENSCSAVG00000002950/ENSCSAVG00000002104/ENSCSAVG00000011245/ENSCSAVG00000008863/ENSCSAVG00000009651/ENSCSAVG00000010148/ENSCSAVG00000004080/novel.2106/novel.4805	-/-/-/-/-/-/-/-/-/-/-/-/-/-/-	15
BP	GO:0007049	cell cycle	12/343	32/3685	1.41702e-05	0.000613366	ENSCSAVG00000006238/ENSCSAVG00000009308/ENSCSAVG00000001219/ENSCSAVG00000000975/novel.3018/novel.6150/novel.6011/ENSCSAVG00000003091/novel.6722/ENSCSAVG00000008863/novel.4065/ENSCSAVG00000001334	-/-/-/-/-/-/-/-/-/-/-/-	12
BP	GO:0006281	DNA repair	13/343	42/3685	6.57736e-05	0.00249117	ENSCSAVG00000002161/ENSCSAVG00000011569/ENSCSAVG00000002921/ENSCSAVG00000009341/ENSCSAVG00000001364/ENSCSAVG00000002950/ENSCSAVG00000002104/ENSCSAVG00000011245/ENSCSAVG00000009651/ENSCSAVG00000010148/ENSCSAVG00000004080/novel.2106/novel.4805	-/-/-/-/-/-/-/-/-/-/-/-/-	13
BP	GO:0022402	cell cycle process	7/343	16/3685	0.000310547	0.0104551	ENSCSAVG00000006238/novel.6150/novel.6011/ENSCSAVG00000003091/novel.6722/novel.4065/ENSCSAVG00000001334	-/-/-/-/-/-/-	7
BP	GO:0006950	response to stress	16/343	72/3685	0.000713547	0.0216205	ENSCSAVG00000001650/ENSCSAVG00000002161/ENSCSAVG00000011569/ENSCSAVG00000002921/ENSCSAVG00000009341/ENSCSAVG00000000975/ENSCSAVG00000001364/ENSCSAVG00000002950/ENSCSAVG00000002104/ENSCSAVG00000011245/ENSCSAVG00000008863/ENSCSAVG00000009651/ENSCSAVG00000010148/ENSCSAVG00000004080/novel.2106/novel.4805	-/-/-/-/-/-/-/-/-/-/-/-/-/-/-/-	16
BP	GO:0007018	microtubule-based movement	12/343	49/3685	0.00134554	0.0282035	ENSCSAVG00000010617/ENSCSAVG00000005324/ENSCSAVG00000007178/ENSCSAVG00000010315/ENSCSAVG00000004560/ENSCSAVG00000004628/ENSCSAVG00000001454/ENSCSAVG00000010314/ENSCSAVG00000006750/novel.1690/ENSCSAVG00000005545/novel.1715	-/-/-/-/-/-/-/-/-/-/-/-	12
BP	GO:0006928	movement of cell or subcellular component	12/343	51/3685	0.0019518	0.0282035	ENSCSAVG00000010617/ENSCSAVG00000005324/ENSCSAVG00000007178/ENSCSAVG00000010315/ENSCSAVG00000004560/ENSCSAVG00000004628/ENSCSAVG00000001454/ENSCSAVG00000010314/ENSCSAVG00000006750/novel.1690/ENSCSAVG00000005545/novel.1715	-/-/-/-/-/-/-/-/-/-/-/-	12
BP	GO:0009891	positive regulation of biosynthetic process	5/343	11/3685	0.0019547	0.0282035	novel.4450/novel.3916/novel.2238/novel.623/novel.3489	-/-/-/-/-	5
BP	GO:0010557	positive regulation of macromolecule biosynthetic process	5/343	11/3685	0.0019547	0.0282035	novel.4450/novel.3916/novel.2238/novel.623/novel.3489	-/-/-/-/-	5
BP	GO:0010628	positive regulation of gene expression	5/343	11/3685	0.0019547	0.0282035	novel.4450/novel.3916/novel.2238/novel.623/novel.3489	-/-/-/-/-	5
BP	GO:0031328	positive regulation of cellular biosynthetic process	5/343	11/3685	0.0019547	0.0282035	novel.4450/novel.3916/novel.2238/novel.623/novel.3489	-/-/-/-/-	5
BP	GO:0045893	positive regulation of transcription, DNA-templated	5/343	11/3685	0.0019547	0.0282035	novel.4450/novel.3916/novel.2238/novel.623/novel.3489	-/-/-/-/-	5
BP	GO:0045935	positive regulation of nucleobase-containing compound metabolic process	5/343	11/3685	0.0019547	0.0282035	novel.4450/novel.3916/novel.2238/novel.623/novel.3489	-/-/-/-/-	5
BP	GO:0051254	positive regulation of RNA metabolic process	5/343	11/3685	0.0019547	0.0282035	novel.4450/novel.3916/novel.2238/novel.623/novel.3489	-/-/-/-/-	5
BP	GO:1902680	positive regulation of RNA biosynthetic process	5/343	11/3685	0.0019547	0.0282035	novel.4450/novel.3916/novel.2238/novel.623/novel.3489	-/-/-/-/-	5
BP	GO:1903508	positive regulation of nucleic acid-templated transcription	5/343	11/3685	0.0019547	0.0282035	novel.4450/novel.3916/novel.2238/novel.623/novel.3489	-/-/-/-/-	5
BP	GO:0006357	regulation of transcription by RNA polymerase II	7/343	22/3685	0.0028297	0.0375464	novel.191/ENSCSAVG00000010492/novel.4450/novel.3916/novel.2238/novel.623/novel.3489	-/-/-/-/-/-/-	7
BP	GO:0000226	microtubule cytoskeleton organization	5/343	12/3685	0.00309789	0.0375464	ENSCSAVG00000002169/ENSCSAVG00000006238/ENSCSAVG00000008499/ENSCSAVG00000003091/ENSCSAVG00000001334	-/-/-/-/-	5
BP	GO:0010604	positive regulation of macromolecule metabolic process	5/343	12/3685	0.00309789	0.0375464	novel.4450/novel.3916/novel.2238/novel.623/novel.3489	-/-/-/-/-	5
BP	GO:0051173	positive regulation of nitrogen compound metabolic process	5/343	12/3685	0.00309789	0.0375464	novel.4450/novel.3916/novel.2238/novel.623/novel.3489	-/-/-/-/-	5
BP	GO:0006366	transcription by RNA polymerase II	8/343	29/3685	0.00387896	0.0452048	novel.191/ENSCSAVG00000006215/ENSCSAVG00000010492/novel.4450/novel.3916/novel.2238/novel.623/novel.3489	-/-/-/-/-/-/-/-	8
CC	GO:0005694	chromosome	10/175	28/1994	6.82587e-05	0.00368597	novel.6270/ENSCSAVG00000010450/ENSCSAVG00000000975/ENSCSAVG00000009115/ENSCSAVG00000003260/novel.6011/ENSCSAVG00000007728/novel.6722/ENSCSAVG00000006989/novel.4065	-/-/-/-/-/-/-/-/-/-	10
CC	GO:0044427	chromosomal part	7/175	17/1994	0.000324672	0.00876615	novel.6270/ENSCSAVG00000000975/ENSCSAVG00000009115/ENSCSAVG00000007728/novel.6722/ENSCSAVG00000006989/novel.4065	-/-/-/-/-/-/-	7
CC	GO:0015630	microtubule cytoskeleton	9/175	34/1994	0.00191412	0.0344542	ENSCSAVG00000004570/ENSCSAVG00000010617/ENSCSAVG00000005324/ENSCSAVG00000007178/ENSCSAVG00000006238/ENSCSAVG00000008499/ENSCSAVG00000003091/ENSCSAVG00000005545/ENSCSAVG00000001334	-/-/-/-/-/-/-/-/-	9
CC	GO:0005875	microtubule associated complex	7/175	24/1994	0.0033973	0.0381695	ENSCSAVG00000004570/ENSCSAVG00000010617/ENSCSAVG00000005324/ENSCSAVG00000007178/ENSCSAVG00000003091/ENSCSAVG00000005545/ENSCSAVG00000001334	-/-/-/-/-/-/-	7
CC	GO:0098798	mitochondrial protein complex	5/175	13/1994	0.00353421	0.0381695	ENSCSAVG00000011746/novel.5315/ENSCSAVG00000010786/novel.5321/novel.5831	-/-/-/-/-	5

## Sheet: Table S4
Cluster4_Goenrich_significant
Category	GOID	Description	GeneRatio	BgRatio	pvalue	padj	geneID	geneName	Count
BP	GO:0007165	signal transduction	55/250	498/3685	9.35647e-05	0.0190872	ENSCSAVG00000003862/ENSCSAVG00000008121/ENSCSAVG00000011159/ENSCSAVG00000003660/ENSCSAVG00000005150/ENSCSAVG00000010845/ENSCSAVG00000007571/ENSCSAVG00000006219/ENSCSAVG00000008616/ENSCSAVG00000000531/ENSCSAVG00000009235/ENSCSAVG00000005344/ENSCSAVG00000002804/novel.4577/ENSCSAVG00000010905/novel.1942/ENSCSAVG00000000961/ENSCSAVG00000003857/ENSCSAVG00000010487/ENSCSAVG00000001861/ENSCSAVG000000015…	-/-/-/-/-/-/-/-/-/-/-/-/-/-/-/-/-/-/-/-/-/-/-/-/-/-/-/-/-/-/-/-/-/-/-/-/-/-/-/-/-/-/-/-/-/-/-/-/-/-/-/-/-/-/-	55
CC	GO:0099080	supramolecular complex	5/143	12/1994	0.000928914	0.00836022	ENSCSAVG00000006974/ENSCSAVG00000011659/ENSCSAVG00000004689/ENSCSAVG00000011364/ENSCSAVG00000008447	-/-/-/-/-	5
CC	GO:0099081	supramolecular polymer	5/143	12/1994	0.000928914	0.00836022	ENSCSAVG00000006974/ENSCSAVG00000011659/ENSCSAVG00000004689/ENSCSAVG00000011364/ENSCSAVG00000008447	-/-/-/-/-	5
CC	GO:0099512	supramolecular fiber	5/143	12/1994	0.000928914	0.00836022	ENSCSAVG00000006974/ENSCSAVG00000011659/ENSCSAVG00000004689/ENSCSAVG00000011364/ENSCSAVG00000008447	-/-/-/-/-	5
CC	GO:0005856	cytoskeleton	14/143	89/1994	0.00349727	0.0236066	ENSCSAVG00000006974/ENSCSAVG00000001500/ENSCSAVG00000002085/ENSCSAVG00000001107/ENSCSAVG00000005344/ENSCSAVG00000011659/ENSCSAVG00000007820/ENSCSAVG00000006742/novel.5555/ENSCSAVG00000004689/ENSCSAVG00000011364/ENSCSAVG00000008447/ENSCSAVG00000009751/ENSCSAVG00000011548	-/-/-/-/-/-/-/-/-/-/-/-/-/-	14
CC	GO:0044430	cytoskeletal part	12/143	73/1994	0.00470883	0.0254277	ENSCSAVG00000006974/ENSCSAVG00000002085/ENSCSAVG00000001107/ENSCSAVG00000005344/ENSCSAVG00000011659/ENSCSAVG00000006742/novel.5555/ENSCSAVG00000004689/ENSCSAVG00000011364/ENSCSAVG00000008447/ENSCSAVG00000009751/ENSCSAVG00000011548	-/-/-/-/-/-/-/-/-/-/-/-	12
MF	GO:0004888	transmembrane signaling receptor activity	28/414	218/5912	0.00117463	0.0401318	ENSCSAVG00000011159/ENSCSAVG00000000531/ENSCSAVG00000003857/ENSCSAVG00000001861/ENSCSAVG00000002838/ENSCSAVG00000005351/novel.2048/novel.6784/novel.473/ENSCSAVG00000006423/ENSCSAVG00000009215/ENSCSAVG00000009974/novel.3663/novel.2284/ENSCSAVG00000008984/novel.1833/ENSCSAVG00000007704/novel.434/novel.2684/ENSCSAVG00000004945/ENSCSAVG00000001421/novel.2180/ENSCSAVG00000001300/ENSCSAVG00000009171/EN…	-/-/-/-/-/-/-/-/-/-/-/-/-/-/-/-/-/-/-/-/-/-/-/-/-/-/-/-	28
MF	GO:0038023	signaling receptor activity	28/414	218/5912	0.00117463	0.0401318	ENSCSAVG00000011159/ENSCSAVG00000000531/ENSCSAVG00000003857/ENSCSAVG00000001861/ENSCSAVG00000002838/ENSCSAVG00000005351/novel.2048/novel.6784/novel.473/ENSCSAVG00000006423/ENSCSAVG00000009215/ENSCSAVG00000009974/novel.3663/novel.2284/ENSCSAVG00000008984/novel.1833/ENSCSAVG00000007704/novel.434/novel.2684/ENSCSAVG00000004945/ENSCSAVG00000001421/novel.2180/ENSCSAVG00000001300/ENSCSAVG00000009171/EN…	-/-/-/-/-/-/-/-/-/-/-/-/-/-/-/-/-/-/-/-/-/-/-/-/-/-/-/-	28
MF	GO:0060089	molecular transducer activity	28/414	218/5912	0.00117463	0.0401318	ENSCSAVG00000011159/ENSCSAVG00000000531/ENSCSAVG00000003857/ENSCSAVG00000001861/ENSCSAVG00000002838/ENSCSAVG00000005351/novel.2048/novel.6784/novel.473/ENSCSAVG00000006423/ENSCSAVG00000009215/ENSCSAVG00000009974/novel.3663/novel.2284/ENSCSAVG00000008984/novel.1833/ENSCSAVG00000007704/novel.434/novel.2684/ENSCSAVG00000004945/ENSCSAVG00000001421/novel.2180/ENSCSAVG00000001300/ENSCSAVG00000009171/EN…	-/-/-/-/-/-/-/-/-/-/-/-/-/-/-/-/-/-/-/-/-/-/-/-/-/-/-/-	28
MF	GO:0004871	signal transducer activity	29/414	232/5912	0.00148244	0.0401318	ENSCSAVG00000011159/ENSCSAVG00000005150/ENSCSAVG00000000531/ENSCSAVG00000003857/ENSCSAVG00000001861/ENSCSAVG00000002838/ENSCSAVG00000005351/novel.2048/novel.6784/novel.473/ENSCSAVG00000006423/ENSCSAVG00000009215/ENSCSAVG00000009974/novel.3663/novel.2284/ENSCSAVG00000008984/novel.1833/ENSCSAVG00000007704/novel.434/novel.2684/ENSCSAVG00000004945/ENSCSAVG00000001421/novel.2180/ENSCSAVG00000001300/EN…	-/-/-/-/-/-/-/-/-/-/-/-/-/-/-/-/-/-/-/-/-/-/-/-/-/-/-/-/-	29
MF	GO:0004930	G-protein coupled receptor activity	26/414	201/5912	0.00157561	0.0401318	ENSCSAVG00000011159/ENSCSAVG00000000531/ENSCSAVG00000003857/ENSCSAVG00000001861/ENSCSAVG00000002838/novel.2048/novel.6784/novel.473/ENSCSAVG00000006423/ENSCSAVG00000009215/ENSCSAVG00000009974/novel.3663/novel.2284/ENSCSAVG00000008984/novel.1833/ENSCSAVG00000007704/novel.434/novel.2684/ENSCSAVG00000004945/ENSCSAVG00000001421/novel.2180/ENSCSAVG00000009171/ENSCSAVG00000007314/ENSCSAVG00000001618/EN…	-/-/-/-/-/-/-/-/-/-/-/-/-/-/-/-/-/-/-/-/-/-/-/-/-/-	26
MF	GO:0030545	receptor regulator activity	7/414	26/5912	0.00160527	0.0401318	ENSCSAVG00000001850/ENSCSAVG00000002641/ENSCSAVG00000008695/ENSCSAVG00000004278/novel.5811/novel.3586/ENSCSAVG00000001203	-/-/-/-/-/-/-	7
MF	GO:0048018	receptor ligand activity	7/414	26/5912	0.00160527	0.0401318	ENSCSAVG00000001850/ENSCSAVG00000002641/ENSCSAVG00000008695/ENSCSAVG00000004278/novel.5811/novel.3586/ENSCSAVG00000001203	-/-/-/-/-/-/-	7

## Sheet: Table S5
Cluster7_Goenrich_significant
Category	GOID	Description	GeneRatio	BgRatio	pvalue	padj	geneID	geneName	Count
BP	GO:0006979	response to oxidative stress	8/362	17/3685	8.81407e-05	0.023181	ENSCSAVG00000001487/ENSCSAVG00000000239/ENSCSAVG00000010749/ENSCSAVG00000003383/ENSCSAVG00000000436/ENSCSAVG00000007044/ENSCSAVG00000010453/ENSCSAVG00000011638	-/-/-/-/-/-/-/-	8
CC	GO:0016459	myosin complex	9/190	25/1994	0.00028394	0.0148441	ENSCSAVG00000001598/ENSCSAVG00000004941/ENSCSAVG00000004814/ENSCSAVG00000008225/ENSCSAVG00000011586/novel.374/novel.4510/ENSCSAVG00000005238/novel.4509	-/-/-/-/-/-/-/-/-	9
CC	GO:0044421	extracellular region part	9/190	27/1994	0.000549782	0.0148441	ENSCSAVG00000011292/ENSCSAVG00000011669/ENSCSAVG00000008438/ENSCSAVG00000009177/ENSCSAVG00000011799/ENSCSAVG00000004350/ENSCSAVG00000010746/ENSCSAVG00000010873/novel.3196	-/-/-/-/-/-/-/-/-	9
MF	GO:0004601	peroxidase activity	8/629	17/5912	0.000159225	0.0321634	ENSCSAVG00000001487/ENSCSAVG00000000239/ENSCSAVG00000010749/ENSCSAVG00000003383/ENSCSAVG00000000436/ENSCSAVG00000007044/ENSCSAVG00000010453/ENSCSAVG00000011638	-/-/-/-/-/-/-/-	8
MF	GO:0016684	oxidoreductase activity, acting on peroxide as acceptor	8/629	20/5912	0.00061698	0.0412409	ENSCSAVG00000001487/ENSCSAVG00000000239/ENSCSAVG00000010749/ENSCSAVG00000003383/ENSCSAVG00000000436/ENSCSAVG00000007044/ENSCSAVG00000010453/ENSCSAVG00000011638	-/-/-/-/-/-/-/-	8
MF	GO:0098772	molecular function regulator	23/629	107/5912	0.000697538	0.0412409	ENSCSAVG00000011292/ENSCSAVG00000004424/ENSCSAVG00000006931/ENSCSAVG00000009547/ENSCSAVG00000002550/ENSCSAVG00000001687/ENSCSAVG00000000313/ENSCSAVG00000010620/ENSCSAVG00000000523/novel.3755/ENSCSAVG00000010455/ENSCSAVG00000004750/ENSCSAVG00000000489/ENSCSAVG00000003886/ENSCSAVG00000004495/ENSCSAVG00000004350/ENSCSAVG00000002125/novel.3424/ENSCSAVG00000010094/novel.2671/novel.7059/ENSCSAVG0000001…	-/-/-/-/-/-/-/-/-/-/-/-/-/-/-/-/-/-/-/-/-/-/-	23
MF	GO:0005085	guanyl-nucleotide exchange factor activity	10/629	32/5912	0.0012653	0.0412409	ENSCSAVG00000009547/ENSCSAVG00000002550/ENSCSAVG00000001687/ENSCSAVG00000000313/ENSCSAVG00000000523/novel.3755/ENSCSAVG00000010455/ENSCSAVG00000000489/ENSCSAVG00000004495/ENSCSAVG00000002125	-/-/-/-/-/-/-/-/-/-	10
MF	GO:0016209	antioxidant activity	8/629	22/5912	0.00129124	0.0412409	ENSCSAVG00000001487/ENSCSAVG00000000239/ENSCSAVG00000010749/ENSCSAVG00000003383/ENSCSAVG00000000436/ENSCSAVG00000007044/ENSCSAVG00000010453/ENSCSAVG00000011638	-/-/-/-/-/-/-/-	8
MF	GO:0017048	Rho GTPase binding	8/629	23/5912	0.00179813	0.0412409	ENSCSAVG00000009547/ENSCSAVG00000002550/ENSCSAVG00000001687/ENSCSAVG00000008096/ENSCSAVG00000000523/ENSCSAVG00000000489/ENSCSAVG00000006918/ENSCSAVG00000002125	-/-/-/-/-/-/-/-	8
MF	GO:0016301	kinase activity	52/629	330/5912	0.00206131	0.0412409	ENSCSAVG00000006396/ENSCSAVG00000009881/ENSCSAVG00000008103/novel.3387/ENSCSAVG00000004617/ENSCSAVG00000000225/ENSCSAVG00000004057/ENSCSAVG00000006481/ENSCSAVG00000009364/ENSCSAVG00000011180/ENSCSAVG00000008276/ENSCSAVG00000001635/ENSCSAVG00000000926/ENSCSAVG00000009855/ENSCSAVG00000009376/ENSCSAVG00000001890/ENSCSAVG00000005684/ENSCSAVG00000005212/ENSCSAVG00000000799/ENSCSAVG00000008711/ENSCSAVG…	-/-/-/-/-/-/-/-/-/-/-/-/-/-/-/-/-/-/-/-/-/-/-/-/-/-/-/-/-/-/-/-/-/-/-/-/-/-/-/-/-/-/-/-/-/-/-/-/-/-/-/-	52
MF	GO:0005126	cytokine receptor binding	5/629	10/5912	0.00214197	0.0412409	ENSCSAVG00000011472/ENSCSAVG00000007192/novel.852/novel.915/novel.337	-/-/-/-/-	5
MF	GO:0005164	tumor necrosis factor receptor binding	5/629	10/5912	0.00214197	0.0412409	ENSCSAVG00000011472/ENSCSAVG00000007192/novel.852/novel.915/novel.337	-/-/-/-/-	5
MF	GO:0032813	tumor necrosis factor receptor superfamily binding	5/629	10/5912	0.00214197	0.0412409	ENSCSAVG00000011472/ENSCSAVG00000007192/novel.852/novel.915/novel.337	-/-/-/-/-	5
MF	GO:0004672	protein kinase activity	46/629	285/5912	0.00227323	0.0412409	ENSCSAVG00000006396/ENSCSAVG00000009881/ENSCSAVG00000008103/novel.3387/ENSCSAVG00000004617/ENSCSAVG00000004057/ENSCSAVG00000006481/ENSCSAVG00000009364/ENSCSAVG00000011180/ENSCSAVG00000001635/ENSCSAVG00000000926/ENSCSAVG00000009855/ENSCSAVG00000001890/ENSCSAVG00000005212/ENSCSAVG00000000799/ENSCSAVG00000008711/ENSCSAVG00000002401/ENSCSAVG00000000965/ENSCSAVG00000008136/ENSCSAVG00000008491/novel.89…	-/-/-/-/-/-/-/-/-/-/-/-/-/-/-/-/-/-/-/-/-/-/-/-/-/-/-/-/-/-/-/-/-/-/-/-/-/-/-/-/-/-/-/-/-/-	46
MF	GO:0003950	NAD+ ADP-ribosyltransferase activity	8/629	24/5912	0.00244996	0.0412409	ENSCSAVG00000007134/ENSCSAVG00000007096/ENSCSAVG00000000429/ENSCSAVG00000004787/novel.6394/ENSCSAVG00000003783/novel.6233/ENSCSAVG00000007132	-/-/-/-/-/-/-/-	8
MF	GO:0051020	GTPase binding	12/629	47/5912	0.00297398	0.0462111	ENSCSAVG00000009547/ENSCSAVG00000002550/ENSCSAVG00000001687/ENSCSAVG00000000313/ENSCSAVG00000008096/ENSCSAVG00000000523/novel.3755/ENSCSAVG00000010455/ENSCSAVG00000000489/ENSCSAVG00000004495/ENSCSAVG00000006918/ENSCSAVG00000002125	-/-/-/-/-/-/-/-/-/-/-/-	12

## Sheet: Table S6
Immune segment vs sto up GO_enrich
Category	GOID	Description	GeneRatio	BgRatio	pvalue	padj	geneID	geneName	Count
BP	GO:0007154	cell communication	132/577	494/3605	3.12967e-11	7.54251e-09	ENSCSAVG00000001861/ENSCSAVG00000001565/ENSCSAVG00000001725/novel.118/ENSCSAVG00000006423/ENSCSAVG00000005770/ENSCSAVG00000003857/ENSCSAVG00000008616/ENSCSAVG00000010358/ENSCSAVG00000005480/novel.1075/ENSCSAVG00000011669/ENSCSAVG00000009177/ENSCSAVG00000009002/novel.473/ENSCSAVG00000000254/novel.3231/ENSCSAVG00000000531/ENSCSAVG00000007313/ENSCSAVG00000008984/ENSCSAVG00000010016/ENSCSAVG000000089…	-/-/-/-/-/-/-/-/-/-/-/-/-/-/-/-/-/-/-/-/-/-/-/-/-/-/-/-/-/-/-/-/-/-/-/-/-/-/-/-/-/-/-/-/-/-/-/-/-/-/-/-/-/-/-/-/-/-/-/-/-/-/-/-/-/-/-/-/-/-/-/-/-/-/-/-/-/-/-/-/-/-/-/-/-/-/-/-/-/-/-/-/-/-/-/-/-/-/-/-/-/-/-/-/-/-/-/-/-/-/-/-/-/-/-/-/-/-/-/-/-/-/-/-/-/-/-/-/-/-/-/-	132
BP	GO:0023052	signaling	125/577	485/3605	1.66525e-09	1.35176e-07	ENSCSAVG00000001861/ENSCSAVG00000001565/ENSCSAVG00000001725/novel.118/ENSCSAVG00000006423/ENSCSAVG00000005770/ENSCSAVG00000003857/ENSCSAVG00000008616/ENSCSAVG00000010358/ENSCSAVG00000005480/novel.1075/ENSCSAVG00000011669/ENSCSAVG00000009177/ENSCSAVG00000009002/novel.473/novel.3231/ENSCSAVG00000000531/ENSCSAVG00000007313/ENSCSAVG00000008984/ENSCSAVG00000010016/ENSCSAVG00000008982/novel.5370/ENSCSA…	-/-/-/-/-/-/-/-/-/-/-/-/-/-/-/-/-/-/-/-/-/-/-/-/-/-/-/-/-/-/-/-/-/-/-/-/-/-/-/-/-/-/-/-/-/-/-/-/-/-/-/-/-/-/-/-/-/-/-/-/-/-/-/-/-/-/-/-/-/-/-/-/-/-/-/-/-/-/-/-/-/-/-/-/-/-/-/-/-/-/-/-/-/-/-/-/-/-/-/-/-/-/-/-/-/-/-/-/-/-/-/-/-/-/-/-/-/-/-/-/-/-/-/-/-	125
BP	GO:0007165	signal transduction	124/577	480/3605	1.68269e-09	1.35176e-07	ENSCSAVG00000001861/ENSCSAVG00000001565/ENSCSAVG00000001725/novel.118/ENSCSAVG00000006423/ENSCSAVG00000003857/ENSCSAVG00000008616/ENSCSAVG00000010358/ENSCSAVG00000005480/novel.1075/ENSCSAVG00000011669/ENSCSAVG00000009177/ENSCSAVG00000009002/novel.473/novel.3231/ENSCSAVG00000000531/ENSCSAVG00000007313/ENSCSAVG00000008984/ENSCSAVG00000010016/ENSCSAVG00000008982/novel.5370/ENSCSAVG00000009547/novel.…	-/-/-/-/-/-/-/-/-/-/-/-/-/-/-/-/-/-/-/-/-/-/-/-/-/-/-/-/-/-/-/-/-/-/-/-/-/-/-/-/-/-/-/-/-/-/-/-/-/-/-/-/-/-/-/-/-/-/-/-/-/-/-/-/-/-/-/-/-/-/-/-/-/-/-/-/-/-/-/-/-/-/-/-/-/-/-/-/-/-/-/-/-/-/-/-/-/-/-/-/-/-/-/-/-/-/-/-/-/-/-/-/-/-/-/-/-/-/-/-/-/-/-/-	124
BP	GO:0009100	glycoprotein metabolic process	32/577	99/3605	3.43661e-05	0.00165645	ENSCSAVG00000000251/ENSCSAVG00000009020/ENSCSAVG00000004928/ENSCSAVG00000009524/ENSCSAVG00000000756/ENSCSAVG00000009214/novel.2566/novel.3886/ENSCSAVG00000009532/ENSCSAVG00000003998/ENSCSAVG00000010821/ENSCSAVG00000008945/ENSCSAVG00000001040/ENSCSAVG00000010037/ENSCSAVG00000007217/novel.4401/ENSCSAVG00000007666/ENSCSAVG00000001030/ENSCSAVG00000007205/ENSCSAVG00000007659/novel.1693/ENSCSAVG0000000…	-/-/-/-/-/-/-/-/-/-/-/-/-/-/-/-/-/-/-/-/-/-/-/-/-/-/-/-/-/-/-/-	32
BP	GO:0009101	glycoprotein biosynthetic process	32/577	99/3605	3.43661e-05	0.00165645	ENSCSAVG00000000251/ENSCSAVG00000009020/ENSCSAVG00000004928/ENSCSAVG00000009524/ENSCSAVG00000000756/ENSCSAVG00000009214/novel.2566/novel.3886/ENSCSAVG00000009532/ENSCSAVG00000003998/ENSCSAVG00000010821/ENSCSAVG00000008945/ENSCSAVG00000001040/ENSCSAVG00000010037/ENSCSAVG00000007217/novel.4401/ENSCSAVG00000007666/ENSCSAVG00000001030/ENSCSAVG00000007205/ENSCSAVG00000007659/novel.1693/ENSCSAVG0000000…	-/-/-/-/-/-/-/-/-/-/-/-/-/-/-/-/-/-/-/-/-/-/-/-/-/-/-/-/-/-/-/-	32
BP	GO:0007155	cell adhesion	17/577	40/3605	5.5901e-05	0.00192459	novel.760/ENSCSAVG00000005847/ENSCSAVG00000006651/ENSCSAVG00000000186/novel.7020/novel.1145/ENSCSAVG00000003796/ENSCSAVG00000011436/ENSCSAVG00000005329/ENSCSAVG00000009559/ENSCSAVG00000006221/ENSCSAVG00000004201/ENSCSAVG00000003064/ENSCSAVG00000007603/ENSCSAVG00000010201/ENSCSAVG00000011698/ENSCSAVG00000009836	-/-/-/-/-/-/-/-/-/-/-/-/-/-/-/-/-	17
BP	GO:0022610	biological adhesion	17/577	40/3605	5.5901e-05	0.00192459	novel.760/ENSCSAVG00000005847/ENSCSAVG00000006651/ENSCSAVG00000000186/novel.7020/novel.1145/ENSCSAVG00000003796/ENSCSAVG00000011436/ENSCSAVG00000005329/ENSCSAVG00000009559/ENSCSAVG00000006221/ENSCSAVG00000004201/ENSCSAVG00000003064/ENSCSAVG00000007603/ENSCSAVG00000010201/ENSCSAVG00000011698/ENSCSAVG00000009836	-/-/-/-/-/-/-/-/-/-/-/-/-/-/-/-/-	17
BP	GO:0006486	protein glycosylation	30/577	96/3605	0.000121863	0.00293689	ENSCSAVG00000000251/ENSCSAVG00000009020/ENSCSAVG00000004928/ENSCSAVG00000009524/ENSCSAVG00000000756/ENSCSAVG00000009214/novel.2566/novel.3886/ENSCSAVG00000009532/ENSCSAVG00000003998/ENSCSAVG00000010821/ENSCSAVG00000008945/ENSCSAVG00000001040/ENSCSAVG00000007217/novel.4401/ENSCSAVG00000007666/ENSCSAVG00000001030/ENSCSAVG00000007205/ENSCSAVG00000007659/novel.1693/ENSCSAVG00000002509/ENSCSAVG0000000…	-/-/-/-/-/-/-/-/-/-/-/-/-/-/-/-/-/-/-/-/-/-/-/-/-/-/-/-/-/-	30
BP	GO:0043413	macromolecule glycosylation	30/577	96/3605	0.000121863	0.00293689	ENSCSAVG00000000251/ENSCSAVG00000009020/ENSCSAVG00000004928/ENSCSAVG00000009524/ENSCSAVG00000000756/ENSCSAVG00000009214/novel.2566/novel.3886/ENSCSAVG00000009532/ENSCSAVG00000003998/ENSCSAVG00000010821/ENSCSAVG00000008945/ENSCSAVG00000001040/ENSCSAVG00000007217/novel.4401/ENSCSAVG00000007666/ENSCSAVG00000001030/ENSCSAVG00000007205/ENSCSAVG00000007659/novel.1693/ENSCSAVG00000002509/ENSCSAVG0000000…	-/-/-/-/-/-/-/-/-/-/-/-/-/-/-/-/-/-/-/-/-/-/-/-/-/-/-/-/-/-	30
BP	GO:0070085	glycosylation	30/577	96/3605	0.000121863	0.00293689	ENSCSAVG00000000251/ENSCSAVG00000009020/ENSCSAVG00000004928/ENSCSAVG00000009524/ENSCSAVG00000000756/ENSCSAVG00000009214/novel.2566/novel.3886/ENSCSAVG00000009532/ENSCSAVG00000003998/ENSCSAVG00000010821/ENSCSAVG00000008945/ENSCSAVG00000001040/ENSCSAVG00000007217/novel.4401/ENSCSAVG00000007666/ENSCSAVG00000001030/ENSCSAVG00000007205/ENSCSAVG00000007659/novel.1693/ENSCSAVG00000002509/ENSCSAVG0000000…	-/-/-/-/-/-/-/-/-/-/-/-/-/-/-/-/-/-/-/-/-/-/-/-/-/-/-/-/-/-	30
BP	GO:0006979	response to oxidative stress	9/577	17/3605	0.000469502	0.00880883	ENSCSAVG00000006587/ENSCSAVG00000003383/ENSCSAVG00000009717/ENSCSAVG00000007044/ENSCSAVG00000009287/ENSCSAVG00000010453/ENSCSAVG00000000239/ENSCSAVG00000010925/ENSCSAVG00000011638	-/-/-/-/-/-/-/-/-	9
BP	GO:0002376	immune system process	7/577	11/3605	0.000475165	0.00880883	ENSCSAVG00000011575/ENSCSAVG00000007192/novel.3093/novel.852/ENSCSAVG00000011473/novel.915/ENSCSAVG00000011472	-/-/-/-/-/-/-	7
BP	GO:0006955	immune response	7/577	11/3605	0.000475165	0.00880883	ENSCSAVG00000011575/ENSCSAVG00000007192/novel.3093/novel.852/ENSCSAVG00000011473/novel.915/ENSCSAVG00000011472	-/-/-/-/-/-/-	7
BP	GO:1901135	carbohydrate derivative metabolic process	47/577	187/3605	0.000641359	0.0110405	ENSCSAVG00000002589/ENSCSAVG00000002598/ENSCSAVG00000004268/ENSCSAVG00000000251/ENSCSAVG00000009020/ENSCSAVG00000008982/ENSCSAVG00000004928/ENSCSAVG00000008833/ENSCSAVG00000009524/ENSCSAVG00000009545/ENSCSAVG00000002593/ENSCSAVG00000000143/ENSCSAVG00000000756/ENSCSAVG00000009214/novel.2566/ENSCSAVG00000011403/novel.3886/ENSCSAVG00000009532/ENSCSAVG00000003998/ENSCSAVG00000010821/ENSCSAVG000000021…	-/-/-/-/-/-/-/-/-/-/-/-/-/-/-/-/-/-/-/-/-/-/-/-/-/-/-/-/-/-/-/-/-/-/-/-/-/-/-/-/-/-/-/-/-/-/-	47
BP	GO:1901137	carbohydrate derivative biosynthetic process	38/577	149/3605	0.00157676	0.0253333	ENSCSAVG00000000251/ENSCSAVG00000009020/ENSCSAVG00000008982/ENSCSAVG00000004928/ENSCSAVG00000009524/ENSCSAVG00000000143/ENSCSAVG00000000756/ENSCSAVG00000009214/novel.2566/novel.3886/ENSCSAVG00000009532/ENSCSAVG00000003998/ENSCSAVG00000010821/ENSCSAVG00000008945/ENSCSAVG00000006825/ENSCSAVG00000001040/ENSCSAVG00000010037/ENSCSAVG00000007217/novel.4401/ENSCSAVG00000007666/ENSCSAVG00000001030/ENSCSA…	-/-/-/-/-/-/-/-/-/-/-/-/-/-/-/-/-/-/-/-/-/-/-/-/-/-/-/-/-/-/-/-/-/-/-/-/-/-	38
BP	GO:0030001	metal ion transport	15/577	45/3605	0.00305406	0.0460018	ENSCSAVG00000010537/ENSCSAVG00000006202/ENSCSAVG00000011661/ENSCSAVG00000005038/ENSCSAVG00000003089/ENSCSAVG00000007166/novel.6526/ENSCSAVG00000006095/ENSCSAVG00000005586/ENSCSAVG00000002557/ENSCSAVG00000009074/ENSCSAVG00000005290/ENSCSAVG00000006185/ENSCSAVG00000005201/ENSCSAVG00000008349	-/-/-/-/-/-/-/-/-/-/-/-/-/-/-	15
CC	GO:0031012	extracellular matrix	13/347	21/1936	8.16605e-06	0.000226404	ENSCSAVG00000008438/ENSCSAVG00000009501/ENSCSAVG00000011567/ENSCSAVG00000011307/ENSCSAVG00000011669/ENSCSAVG00000009177/ENSCSAVG00000004345/ENSCSAVG00000004828/ENSCSAVG00000010746/novel.19/ENSCSAVG00000006221/ENSCSAVG00000011799/ENSCSAVG00000005184	-/-/-/-/-/-/-/-/-/-/-/-/-	13
CC	GO:0044421	extracellular region part	15/347	27/1936	1.02911e-05	0.000226404	ENSCSAVG00000008438/ENSCSAVG00000009501/ENSCSAVG00000011567/ENSCSAVG00000011307/ENSCSAVG00000011669/ENSCSAVG00000009177/ENSCSAVG00000004345/ENSCSAVG00000004350/ENSCSAVG00000004828/ENSCSAVG00000010746/ENSCSAVG00000011292/novel.19/ENSCSAVG00000006221/ENSCSAVG00000011799/ENSCSAVG00000005184	-/-/-/-/-/-/-/-/-/-/-/-/-/-/-	15
CC	GO:0005576	extracellular region	27/347	73/1936	6.37442e-05	0.000934915	ENSCSAVG00000008438/ENSCSAVG00000009501/ENSCSAVG00000006651/ENSCSAVG00000011567/ENSCSAVG00000011307/ENSCSAVG00000011669/ENSCSAVG00000009177/novel.5122/ENSCSAVG00000010016/ENSCSAVG00000004345/ENSCSAVG00000000644/ENSCSAVG00000004350/ENSCSAVG00000009545/ENSCSAVG00000004828/ENSCSAVG00000010746/ENSCSAVG00000011292/novel.5169/novel.19/ENSCSAVG00000001405/ENSCSAVG00000006221/ENSCSAVG00000002117/ENSCSAVG…	-/-/-/-/-/-/-/-/-/-/-/-/-/-/-/-/-/-/-/-/-/-/-/-/-/-/-	27
MF	GO:0004222	metalloendopeptidase activity	21/867	44/5773	2.60106e-07	5.02005e-05	ENSCSAVG00000008438/ENSCSAVG00000009501/ENSCSAVG00000011567/ENSCSAVG00000011307/ENSCSAVG00000011179/ENSCSAVG00000004345/ENSCSAVG00000004828/ENSCSAVG00000010746/ENSCSAVG00000004572/ENSCSAVG00000010351/novel.19/ENSCSAVG00000002275/ENSCSAVG00000003064/ENSCSAVG00000011799/ENSCSAVG00000009592/ENSCSAVG00000006270/ENSCSAVG00000008681/ENSCSAVG00000010093/ENSCSAVG00000000426/ENSCSAVG00000005184/ENSCSAVG00…	-/-/-/-/-/-/-/-/-/-/-/-/-/-/-/-/-/-/-/-/-	21
MF	GO:0043565	sequence-specific DNA binding	29/867	85/5773	8.08121e-06	0.000495163	ENSCSAVG00000003957/ENSCSAVG00000003964/ENSCSAVG00000004034/ENSCSAVG00000010057/novel.281/ENSCSAVG00000003321/ENSCSAVG00000004996/ENSCSAVG00000009393/ENSCSAVG00000001734/ENSCSAVG00000001703/ENSCSAVG00000009468/ENSCSAVG00000005981/ENSCSAVG00000004898/ENSCSAVG00000001146/ENSCSAVG00000000153/ENSCSAVG00000005984/ENSCSAVG00000005307/novel.544/ENSCSAVG00000003070/ENSCSAVG00000004649/ENSCSAVG00000001918…	-/-/-/-/-/-/-/-/-/-/-/-/-/-/-/-/-/-/-/-/-/-/-/-/-/-/-/-/-	29
MF	GO:0005509	calcium ion binding	45/867	159/5773	9.66442e-06	0.000495163	novel.760/ENSCSAVG00000001468/novel.649/ENSCSAVG00000003548/ENSCSAVG00000003852/ENSCSAVG00000005847/ENSCSAVG00000006651/ENSCSAVG00000006017/ENSCSAVG00000000439/ENSCSAVG00000006974/ENSCSAVG00000003383/novel.7020/ENSCSAVG00000011669/ENSCSAVG00000009177/ENSCSAVG00000000364/ENSCSAVG00000007044/ENSCSAVG00000000614/ENSCSAVG00000002262/ENSCSAVG00000006325/ENSCSAVG00000005157/novel.5146/novel.5974/ENSCSA…	-/-/-/-/-/-/-/-/-/-/-/-/-/-/-/-/-/-/-/-/-/-/-/-/-/-/-/-/-/-/-/-/-/-/-/-/-/-/-/-/-/-/-/-/-	45
MF	GO:0016758	transferase activity, transferring hexosyl groups	34/867	108/5773	1.02625e-05	0.000495163	ENSCSAVG00000000251/ENSCSAVG00000000141/ENSCSAVG00000007499/ENSCSAVG00000009020/ENSCSAVG00000004928/ENSCSAVG00000009524/ENSCSAVG00000006799/ENSCSAVG00000000756/ENSCSAVG00000009214/ENSCSAVG00000009532/ENSCSAVG00000003998/ENSCSAVG00000010821/ENSCSAVG00000008945/ENSCSAVG00000000268/ENSCSAVG00000001040/ENSCSAVG00000007217/ENSCSAVG00000007244/ENSCSAVG00000007666/ENSCSAVG00000001030/ENSCSAVG00000007205…	-/-/-/-/-/-/-/-/-/-/-/-/-/-/-/-/-/-/-/-/-/-/-/-/-/-/-/-/-/-/-/-/-/-	34
MF	GO:0008237	metallopeptidase activity	25/867	70/5773	1.37489e-05	0.000530706	ENSCSAVG00000008438/ENSCSAVG00000009501/ENSCSAVG00000011567/ENSCSAVG00000011307/ENSCSAVG00000002239/ENSCSAVG00000011179/ENSCSAVG00000004345/ENSCSAVG00000004828/ENSCSAVG00000010746/ENSCSAVG00000005948/ENSCSAVG00000004572/ENSCSAVG00000010351/novel.19/ENSCSAVG00000011031/ENSCSAVG00000002275/ENSCSAVG00000003064/ENSCSAVG00000011799/ENSCSAVG00000009592/ENSCSAVG00000006270/ENSCSAVG00000009282/ENSCSAVG00…	-/-/-/-/-/-/-/-/-/-/-/-/-/-/-/-/-/-/-/-/-/-/-/-/-	25
MF	GO:0005215	transporter activity	92/867	414/5773	3.26019e-05	0.0010487	novel.207/ENSCSAVG00000001418/novel.45/novel.4675/ENSCSAVG00000006272/ENSCSAVG00000000736/ENSCSAVG00000004447/ENSCSAVG00000009731/ENSCSAVG00000008358/ENSCSAVG00000010823/ENSCSAVG00000011491/ENSCSAVG00000001036/ENSCSAVG00000010114/ENSCSAVG00000003116/ENSCSAVG00000010537/ENSCSAVG00000008357/ENSCSAVG00000008234/ENSCSAVG00000005006/ENSCSAVG00000010236/ENSCSAVG00000006202/ENSCSAVG00000003065/ENSCSAVG0…	-/-/-/-/-/-/-/-/-/-/-/-/-/-/-/-/-/-/-/-/-/-/-/-/-/-/-/-/-/-/-/-/-/-/-/-/-/-/-/-/-/-/-/-/-/-/-/-/-/-/-/-/-/-/-/-/-/-/-/-/-/-/-/-/-/-/-/-/-/-/-/-/-/-/-/-/-/-/-/-/-/-/-/-/-/-/-/-/-/-/-/-	92
MF	GO:0005102	signaling receptor binding	19/867	49/5773	3.99964e-05	0.00110276	ENSCSAVG00000011575/ENSCSAVG00000001850/novel.3424/ENSCSAVG00000007192/ENSCSAVG00000010016/novel.3093/ENSCSAVG00000004278/novel.852/ENSCSAVG00000011473/novel.915/ENSCSAVG00000004201/ENSCSAVG00000007523/novel.7059/ENSCSAVG00000010414/ENSCSAVG00000004009/ENSCSAVG00000011185/ENSCSAVG00000005620/ENSCSAVG00000002907/ENSCSAVG00000011472	-/-/-/-/-/-/-/-/-/-/-/-/-/-/-/-/-/-/-	19
MF	GO:0003700	DNA binding transcription factor activity	37/867	134/5773	0.000105395	0.00254265	ENSCSAVG00000003957/ENSCSAVG00000003964/ENSCSAVG00000004034/ENSCSAVG00000010057/novel.281/ENSCSAVG00000003321/ENSCSAVG00000004996/novel.3596/ENSCSAVG00000009393/ENSCSAVG00000001734/ENSCSAVG00000001703/ENSCSAVG00000009468/ENSCSAVG00000005981/ENSCSAVG00000004898/ENSCSAVG00000009650/ENSCSAVG00000001146/ENSCSAVG00000000153/ENSCSAVG00000005984/ENSCSAVG00000005307/ENSCSAVG00000007634/novel.544/ENSCSAVG…	-/-/-/-/-/-/-/-/-/-/-/-/-/-/-/-/-/-/-/-/-/-/-/-/-/-/-/-/-/-/-/-/-/-/-/-/-	37
MF	GO:0098772	molecular function regulator	31/867	106/5773	0.000120445	0.00258288	ENSCSAVG00000008616/ENSCSAVG00000001850/novel.3424/ENSCSAVG00000004350/ENSCSAVG00000009547/ENSCSAVG00000009704/ENSCSAVG00000004278/novel.2671/ENSCSAVG00000011403/ENSCSAVG00000009235/ENSCSAVG00000011292/ENSCSAVG00000000360/ENSCSAVG00000000574/ENSCSAVG00000001405/ENSCSAVG00000001687/ENSCSAVG00000005196/ENSCSAVG00000007523/novel.7059/ENSCSAVG00000004424/ENSCSAVG00000003660/ENSCSAVG00000004574/ENSCSA…	-/-/-/-/-/-/-/-/-/-/-/-/-/-/-/-/-/-/-/-/-/-/-/-/-/-/-/-/-/-/-	31
MF	GO:0046873	metal ion transmembrane transporter activity	23/867	73/5773	0.000270976	0.00373663	ENSCSAVG00000000736/ENSCSAVG00000008358/ENSCSAVG00000010114/ENSCSAVG00000010537/ENSCSAVG00000006202/ENSCSAVG00000003065/ENSCSAVG00000008249/ENSCSAVG00000002043/ENSCSAVG00000011661/ENSCSAVG00000005038/ENSCSAVG00000004253/ENSCSAVG00000007926/ENSCSAVG00000007166/novel.6526/ENSCSAVG00000007039/ENSCSAVG00000006095/ENSCSAVG00000005586/ENSCSAVG00000002557/ENSCSAVG00000009074/ENSCSAVG00000005290/ENSCSAVG…	-/-/-/-/-/-/-/-/-/-/-/-/-/-/-/-/-/-/-/-/-/-/-	23
MF	GO:0004601	peroxidase activity	9/867	17/5773	0.000290411	0.00373663	ENSCSAVG00000006587/ENSCSAVG00000003383/ENSCSAVG00000009717/ENSCSAVG00000007044/ENSCSAVG00000009287/ENSCSAVG00000010453/ENSCSAVG00000000239/ENSCSAVG00000010925/ENSCSAVG00000011638	-/-/-/-/-/-/-/-/-	9
MF	GO:0004866	endopeptidase inhibitor activity	9/867	17/5773	0.000290411	0.00373663	ENSCSAVG00000004350/ENSCSAVG00000009704/novel.2671/ENSCSAVG00000011403/ENSCSAVG00000011292/ENSCSAVG00000001405/ENSCSAVG00000005196/ENSCSAVG00000004424/novel.1886	-/-/-/-/-/-/-/-/-	9
MF	GO:0030414	peptidase inhibitor activity	9/867	17/5773	0.000290411	0.00373663	ENSCSAVG00000004350/ENSCSAVG00000009704/novel.2671/ENSCSAVG00000011403/ENSCSAVG00000011292/ENSCSAVG00000001405/ENSCSAVG00000005196/ENSCSAVG00000004424/novel.1886	-/-/-/-/-/-/-/-/-	9
MF	GO:0061134	peptidase regulator activity	9/867	17/5773	0.000290411	0.00373663	ENSCSAVG00000004350/ENSCSAVG00000009704/novel.2671/ENSCSAVG00000011403/ENSCSAVG00000011292/ENSCSAVG00000001405/ENSCSAVG00000005196/ENSCSAVG00000004424/novel.1886	-/-/-/-/-/-/-/-/-	9
MF	GO:0061135	endopeptidase regulator activity	9/867	17/5773	0.000290411	0.00373663	ENSCSAVG00000004350/ENSCSAVG00000009704/novel.2671/ENSCSAVG00000011403/ENSCSAVG00000011292/ENSCSAVG00000001405/ENSCSAVG00000005196/ENSCSAVG00000004424/novel.1886	-/-/-/-/-/-/-/-/-	9
MF	GO:0008417	fucosyltransferase activity	19/867	56/5773	0.00031777	0.00383311	ENSCSAVG00000000251/ENSCSAVG00000009020/ENSCSAVG00000009524/ENSCSAVG00000000756/ENSCSAVG00000009214/ENSCSAVG00000009532/ENSCSAVG00000003998/ENSCSAVG00000010821/ENSCSAVG00000007217/ENSCSAVG00000007666/ENSCSAVG00000001030/ENSCSAVG00000007205/ENSCSAVG00000007659/novel.1693/ENSCSAVG00000001630/novel.221/ENSCSAVG00000008543/ENSCSAVG00000010758/ENSCSAVG00000006554	-/-/-/-/-/-/-/-/-/-/-/-/-/-/-/-/-/-/-	19
MF	GO:0016757	transferase activity, transferring glycosyl groups	43/867	174/5773	0.000455651	0.00517298	ENSCSAVG00000000251/ENSCSAVG00000000141/ENSCSAVG00000007499/ENSCSAVG00000009020/ENSCSAVG00000004928/ENSCSAVG00000009524/ENSCSAVG00000006799/ENSCSAVG00000000756/ENSCSAVG00000009214/ENSCSAVG00000007063/ENSCSAVG00000005652/ENSCSAVG00000009532/novel.6082/ENSCSAVG00000003998/ENSCSAVG00000010821/ENSCSAVG00000008945/novel.1442/ENSCSAVG00000000268/ENSCSAVG00000004310/ENSCSAVG00000001040/ENSCSAVG000000072…	-/-/-/-/-/-/-/-/-/-/-/-/-/-/-/-/-/-/-/-/-/-/-/-/-/-/-/-/-/-/-/-/-/-/-/-/-/-/-/-/-/-/-	43
MF	GO:0140110	transcription regulator activity	38/867	153/5773	0.000867392	0.00930037	ENSCSAVG00000003957/ENSCSAVG00000003964/ENSCSAVG00000004034/ENSCSAVG00000010057/novel.281/ENSCSAVG00000003321/ENSCSAVG00000004996/novel.3596/ENSCSAVG00000009393/ENSCSAVG00000001734/ENSCSAVG00000001703/ENSCSAVG00000009468/ENSCSAVG00000005981/ENSCSAVG00000004898/ENSCSAVG00000009650/ENSCSAVG00000001146/ENSCSAVG00000000153/ENSCSAVG00000005984/ENSCSAVG00000005307/ENSCSAVG00000007634/novel.544/ENSCSAVG…	-/-/-/-/-/-/-/-/-/-/-/-/-/-/-/-/-/-/-/-/-/-/-/-/-/-/-/-/-/-/-/-/-/-/-/-/-/-	38
MF	GO:0017048	Rho GTPase binding	10/867	23/5773	0.000981816	0.00997318	ENSCSAVG00000008616/ENSCSAVG00000009547/ENSCSAVG00000009235/ENSCSAVG00000000360/ENSCSAVG00000000574/ENSCSAVG00000001687/ENSCSAVG00000008096/ENSCSAVG00000003660/ENSCSAVG00000004574/ENSCSAVG00000006918	-/-/-/-/-/-/-/-/-/-	10
MF	GO:0008484	sulfuric ester hydrolase activity	7/867	13/5773	0.00125816	0.0120561	ENSCSAVG00000008581/ENSCSAVG00000004612/ENSCSAVG00000001833/ENSCSAVG00000003934/ENSCSAVG00000003786/ENSCSAVG00000005424/ENSCSAVG00000001602	-/-/-/-/-/-/-	7
MF	GO:0016684	oxidoreductase activity, acting on peroxide as acceptor	9/867	20/5773	0.0013118	0.0120561	ENSCSAVG00000006587/ENSCSAVG00000003383/ENSCSAVG00000009717/ENSCSAVG00000007044/ENSCSAVG00000009287/ENSCSAVG00000010453/ENSCSAVG00000000239/ENSCSAVG00000010925/ENSCSAVG00000011638	-/-/-/-/-/-/-/-/-	9
MF	GO:0004867	serine-type endopeptidase inhibitor activity	6/867	10/5773	0.00137652	0.0120759	novel.2671/ENSCSAVG00000011403/ENSCSAVG00000001405/ENSCSAVG00000005196/ENSCSAVG00000004424/novel.1886	-/-/-/-/-/-	6
MF	GO:0004857	enzyme inhibitor activity	9/867	21/5773	0.00199354	0.0167284	ENSCSAVG00000004350/ENSCSAVG00000009704/novel.2671/ENSCSAVG00000011403/ENSCSAVG00000011292/ENSCSAVG00000001405/ENSCSAVG00000005196/ENSCSAVG00000004424/novel.1886	-/-/-/-/-/-/-/-/-	9
MF	GO:0008233	peptidase activity	53/867	242/5773	0.002236	0.0179812	ENSCSAVG00000010564/ENSCSAVG00000008438/ENSCSAVG00000009501/ENSCSAVG00000000837/ENSCSAVG00000011567/ENSCSAVG00000005770/ENSCSAVG00000006624/ENSCSAVG00000001457/ENSCSAVG00000011307/ENSCSAVG00000000540/ENSCSAVG00000000883/ENSCSAVG00000002239/ENSCSAVG00000006628/ENSCSAVG00000011179/ENSCSAVG00000004345/ENSCSAVG00000006492/ENSCSAVG00000008097/ENSCSAVG00000004828/ENSCSAVG00000010746/ENSCSAVG00000005948…	-/-/-/-/-/-/-/-/-/-/-/-/-/-/-/-/-/-/-/-/-/-/-/-/-/-/-/-/-/-/-/-/-/-/-/-/-/-/-/-/-/-/-/-/-/-/-/-/-/-/-/-/-	53
MF	GO:0004930	G-protein coupled receptor activity	43/867	188/5773	0.00241115	0.0186141	ENSCSAVG00000001861/ENSCSAVG00000001725/novel.118/ENSCSAVG00000006423/ENSCSAVG00000003857/novel.1075/ENSCSAVG00000009002/novel.473/ENSCSAVG00000000531/ENSCSAVG00000008984/novel.3839/novel.3437/novel.957/ENSCSAVG00000009215/novel.2284/ENSCSAVG00000010289/novel.522/ENSCSAVG00000011159/novel.2048/novel.3479/ENSCSAVG00000009974/ENSCSAVG00000001281/novel.3965/novel.551/ENSCSAVG00000008700/novel.5592/E…	-/-/-/-/-/-/-/-/-/-/-/-/-/-/-/-/-/-/-/-/-/-/-/-/-/-/-/-/-/-/-/-/-/-/-/-/-/-/-/-/-/-/-	43
MF	GO:0016209	antioxidant activity	9/867	22/5773	0.00293053	0.0217535	ENSCSAVG00000006587/ENSCSAVG00000003383/ENSCSAVG00000009717/ENSCSAVG00000007044/ENSCSAVG00000009287/ENSCSAVG00000010453/ENSCSAVG00000000239/ENSCSAVG00000010925/ENSCSAVG00000011638	-/-/-/-/-/-/-/-/-	9
MF	GO:0022857	transmembrane transporter activity	71/867	351/5773	0.00398417	0.0259243	novel.207/novel.45/novel.4675/ENSCSAVG00000006272/ENSCSAVG00000000736/ENSCSAVG00000009731/ENSCSAVG00000008358/ENSCSAVG00000011491/ENSCSAVG00000001036/ENSCSAVG00000010114/ENSCSAVG00000010537/ENSCSAVG00000008357/ENSCSAVG00000005006/ENSCSAVG00000010236/ENSCSAVG00000006202/ENSCSAVG00000003065/ENSCSAVG00000008249/novel.5385/ENSCSAVG00000011168/ENSCSAVG00000002043/ENSCSAVG00000008887/ENSCSAVG0000000885…	-/-/-/-/-/-/-/-/-/-/-/-/-/-/-/-/-/-/-/-/-/-/-/-/-/-/-/-/-/-/-/-/-/-/-/-/-/-/-/-/-/-/-/-/-/-/-/-/-/-/-/-/-/-/-/-/-/-/-/-/-/-/-/-/-/-/-/-/-/-/-	71
MF	GO:0005088	Ras guanyl-nucleotide exchange factor activity	8/867	19/5773	0.00405127	0.0259243	ENSCSAVG00000008616/ENSCSAVG00000009547/ENSCSAVG00000009235/ENSCSAVG00000000360/ENSCSAVG00000000574/ENSCSAVG00000001687/ENSCSAVG00000003660/ENSCSAVG00000004574	-/-/-/-/-/-/-/-	8
MF	GO:0005089	Rho guanyl-nucleotide exchange factor activity	8/867	19/5773	0.00405127	0.0259243	ENSCSAVG00000008616/ENSCSAVG00000009547/ENSCSAVG00000009235/ENSCSAVG00000000360/ENSCSAVG00000000574/ENSCSAVG00000001687/ENSCSAVG00000003660/ENSCSAVG00000004574	-/-/-/-/-/-/-/-	8
MF	GO:0008194	UDP-glycosyltransferase activity	8/867	19/5773	0.00405127	0.0259243	ENSCSAVG00000000141/ENSCSAVG00000007499/ENSCSAVG00000006799/ENSCSAVG00000000268/ENSCSAVG00000007244/ENSCSAVG00000010814/ENSCSAVG00000009132/ENSCSAVG00000000759	-/-/-/-/-/-/-/-	8
MF	GO:0046914	transition metal ion binding	74/867	369/5773	0.00416401	0.0259243	ENSCSAVG00000008438/novel.1978/ENSCSAVG00000009501/ENSCSAVG00000010583/ENSCSAVG00000006635/ENSCSAVG00000011567/ENSCSAVG00000001528/novel.4579/ENSCSAVG00000000361/ENSCSAVG00000011307/novel.6355/ENSCSAVG00000002239/ENSCSAVG00000000947/novel.6512/ENSCSAVG00000004345/ENSCSAVG00000010827/ENSCSAVG00000004980/novel.745/novel.5456/ENSCSAVG00000002719/ENSCSAVG00000006265/novel.746/ENSCSAVG00000011457/ENSC…	-/-/-/-/-/-/-/-/-/-/-/-/-/-/-/-/-/-/-/-/-/-/-/-/-/-/-/-/-/-/-/-/-/-/-/-/-/-/-/-/-/-/-/-/-/-/-/-/-/-/-/-/-/-/-/-/-/-/-/-/-/-/-/-/-/-/-/-/-/-/-/-/-/-	74
MF	GO:0004175	endopeptidase activity	33/867	141/5773	0.00509359	0.0300475	ENSCSAVG00000008438/ENSCSAVG00000009501/ENSCSAVG00000000837/ENSCSAVG00000011567/ENSCSAVG00000011307/ENSCSAVG00000011179/ENSCSAVG00000004345/ENSCSAVG00000006492/ENSCSAVG00000004828/ENSCSAVG00000010746/ENSCSAVG00000008975/ENSCSAVG00000001938/ENSCSAVG00000011281/ENSCSAVG00000004572/ENSCSAVG00000010351/ENSCSAVG00000003224/novel.19/ENSCSAVG00000001709/ENSCSAVG00000002275/novel.1723/ENSCSAVG00000003064…	-/-/-/-/-/-/-/-/-/-/-/-/-/-/-/-/-/-/-/-/-/-/-/-/-/-/-/-/-/-/-/-/-	33
MF	GO:0005085	guanyl-nucleotide exchange factor activity	11/867	32/5773	0.00513765	0.0300475	ENSCSAVG00000008616/ENSCSAVG00000009547/ENSCSAVG00000009235/ENSCSAVG00000000360/ENSCSAVG00000000574/ENSCSAVG00000001687/ENSCSAVG00000003660/ENSCSAVG00000004574/ENSCSAVG00000007717/ENSCSAVG00000000313/ENSCSAVG00000003314	-/-/-/-/-/-/-/-/-/-/-	11
MF	GO:0004871	signal transducer activity	47/867	219/5773	0.00582742	0.0330792	ENSCSAVG00000001861/ENSCSAVG00000001725/novel.118/ENSCSAVG00000006423/ENSCSAVG00000003857/novel.1075/ENSCSAVG00000009002/novel.473/ENSCSAVG00000000531/ENSCSAVG00000008984/novel.3839/novel.3437/novel.957/ENSCSAVG00000009215/novel.2284/ENSCSAVG00000010289/novel.522/ENSCSAVG00000005351/ENSCSAVG00000011159/novel.2048/novel.3479/ENSCSAVG00000009974/ENSCSAVG00000001281/ENSCSAVG00000005150/novel.3965/no…	-/-/-/-/-/-/-/-/-/-/-/-/-/-/-/-/-/-/-/-/-/-/-/-/-/-/-/-/-/-/-/-/-/-/-/-/-/-/-/-/-/-/-/-/-/-/-	47
MF	GO:0015075	ion transmembrane transporter activity	49/867	231/5773	0.00623911	0.0344042	ENSCSAVG00000006272/ENSCSAVG00000000736/ENSCSAVG00000009731/ENSCSAVG00000008358/ENSCSAVG00000011491/ENSCSAVG00000001036/ENSCSAVG00000010114/ENSCSAVG00000010537/ENSCSAVG00000008357/ENSCSAVG00000005006/ENSCSAVG00000010236/ENSCSAVG00000006202/ENSCSAVG00000003065/ENSCSAVG00000008249/ENSCSAVG00000011168/ENSCSAVG00000002043/ENSCSAVG00000008887/ENSCSAVG00000008851/ENSCSAVG00000011661/ENSCSAVG00000008854…	-/-/-/-/-/-/-/-/-/-/-/-/-/-/-/-/-/-/-/-/-/-/-/-/-/-/-/-/-/-/-/-/-/-/-/-/-/-/-/-/-/-/-/-/-/-/-/-/-	49
MF	GO:0070011	peptidase activity, acting on L-amino acid peptides	49/867	232/5773	0.00679805	0.0364451	ENSCSAVG00000010564/ENSCSAVG00000008438/ENSCSAVG00000009501/ENSCSAVG00000000837/ENSCSAVG00000011567/ENSCSAVG00000001457/ENSCSAVG00000011307/ENSCSAVG00000000540/ENSCSAVG00000000883/ENSCSAVG00000002239/ENSCSAVG00000011179/ENSCSAVG00000004345/ENSCSAVG00000006492/ENSCSAVG00000008097/ENSCSAVG00000004828/ENSCSAVG00000010746/ENSCSAVG00000005948/ENSCSAVG00000008975/ENSCSAVG00000001938/ENSCSAVG00000010891…	-/-/-/-/-/-/-/-/-/-/-/-/-/-/-/-/-/-/-/-/-/-/-/-/-/-/-/-/-/-/-/-/-/-/-/-/-/-/-/-/-/-/-/-/-/-/-/-/-	49
MF	GO:0004888	transmembrane signaling receptor activity	44/867	205/5773	0.00747795	0.0370062	ENSCSAVG00000001861/ENSCSAVG00000001725/novel.118/ENSCSAVG00000006423/ENSCSAVG00000003857/novel.1075/ENSCSAVG00000009002/novel.473/ENSCSAVG00000000531/ENSCSAVG00000008984/novel.3839/novel.3437/novel.957/ENSCSAVG00000009215/novel.2284/ENSCSAVG00000010289/novel.522/ENSCSAVG00000005351/ENSCSAVG00000011159/novel.2048/novel.3479/ENSCSAVG00000009974/ENSCSAVG00000001281/novel.3965/novel.551/ENSCSAVG0000…	-/-/-/-/-/-/-/-/-/-/-/-/-/-/-/-/-/-/-/-/-/-/-/-/-/-/-/-/-/-/-/-/-/-/-/-/-/-/-/-/-/-/-/-	44
MF	GO:0038023	signaling receptor activity	44/867	205/5773	0.00747795	0.0370062	ENSCSAVG00000001861/ENSCSAVG00000001725/novel.118/ENSCSAVG00000006423/ENSCSAVG00000003857/novel.1075/ENSCSAVG00000009002/novel.473/ENSCSAVG00000000531/ENSCSAVG00000008984/novel.3839/novel.3437/novel.957/ENSCSAVG00000009215/novel.2284/ENSCSAVG00000010289/novel.522/ENSCSAVG00000005351/ENSCSAVG00000011159/novel.2048/novel.3479/ENSCSAVG00000009974/ENSCSAVG00000001281/novel.3965/novel.551/ENSCSAVG0000…	-/-/-/-/-/-/-/-/-/-/-/-/-/-/-/-/-/-/-/-/-/-/-/-/-/-/-/-/-/-/-/-/-/-/-/-/-/-/-/-/-/-/-/-	44
MF	GO:0060089	molecular transducer activity	44/867	205/5773	0.00747795	0.0370062	ENSCSAVG00000001861/ENSCSAVG00000001725/novel.118/ENSCSAVG00000006423/ENSCSAVG00000003857/novel.1075/ENSCSAVG00000009002/novel.473/ENSCSAVG00000000531/ENSCSAVG00000008984/novel.3839/novel.3437/novel.957/ENSCSAVG00000009215/novel.2284/ENSCSAVG00000010289/novel.522/ENSCSAVG00000005351/ENSCSAVG00000011159/novel.2048/novel.3479/ENSCSAVG00000009974/ENSCSAVG00000001281/novel.3965/novel.551/ENSCSAVG0000…	-/-/-/-/-/-/-/-/-/-/-/-/-/-/-/-/-/-/-/-/-/-/-/-/-/-/-/-/-/-/-/-/-/-/-/-/-/-/-/-/-/-/-/-	44
MF	GO:0015370	solute:sodium symporter activity	11/867	34/5773	0.00857144	0.0413572	ENSCSAVG00000000736/ENSCSAVG00000008358/ENSCSAVG00000010114/ENSCSAVG00000003065/ENSCSAVG00000008249/ENSCSAVG00000002043/ENSCSAVG00000004253/ENSCSAVG00000007926/ENSCSAVG00000007039/ENSCSAVG00000002144/ENSCSAVG00000001642	-/-/-/-/-/-/-/-/-/-/-	11
MF	GO:0008324	cation transmembrane transporter activity	27/867	114/5773	0.00908459	0.0427641	ENSCSAVG00000000736/ENSCSAVG00000009731/ENSCSAVG00000008358/ENSCSAVG00000010114/ENSCSAVG00000010537/ENSCSAVG00000006202/ENSCSAVG00000003065/ENSCSAVG00000008249/ENSCSAVG00000002043/ENSCSAVG00000011661/ENSCSAVG00000005038/ENSCSAVG00000004253/ENSCSAVG00000007926/ENSCSAVG00000007166/novel.6526/ENSCSAVG00000007039/ENSCSAVG00000006095/ENSCSAVG00000005586/ENSCSAVG00000002557/ENSCSAVG00000009074/ENSCSAVG…	-/-/-/-/-/-/-/-/-/-/-/-/-/-/-/-/-/-/-/-/-/-/-/-/-/-/-	27
MF	GO:0020037	heme binding	29/867	125/5773	0.00944441	0.0433993	ENSCSAVG00000001528/ENSCSAVG00000006587/ENSCSAVG00000000361/ENSCSAVG00000003383/novel.6355/ENSCSAVG00000009717/novel.6512/ENSCSAVG00000007044/ENSCSAVG00000008982/ENSCSAVG00000000143/ENSCSAVG00000002719/ENSCSAVG00000009287/ENSCSAVG00000003536/ENSCSAVG00000002582/ENSCSAVG00000011478/ENSCSAVG00000010453/ENSCSAVG00000009530/novel.741/ENSCSAVG00000005864/ENSCSAVG00000001324/ENSCSAVG00000010925/ENSCSAV…	-/-/-/-/-/-/-/-/-/-/-/-/-/-/-/-/-/-/-/-/-/-/-/-/-/-/-/-/-	29

## Sheet: Table S7
Comparison of the intestine of C. savignyi with the digestive system of humans and mice
Fig. 7A
Comared to mouse
Type	Mouse	Othorlogue genes number
Digestive segment	small_intestine	2412
absorption segment	small_intestine	2718
Immune segment	small_intestine	1381
Digestive segment	Large_small	3217
absorption segment	Large_small	3451
Immune segment	Large_small	4150
Digestive segment	pancrease	3442
absorption segment	pancrease	3457
Immune segment	pancrease	1732
Digestive segment	liver	1483
absorption segment	liver	1467
Immune segment	liver	1434
Fig. 7B
Compared to human
Type	Human	Othorlogue genes number
Digestive segment	duodenum	1775
absorption segment	duodenum	1786
Immune segment	duodenum	1127
Digestive segment	small_intestine	2413
absorption segment	small_intestine	2420
Immune segment	small_intestine	1617
Digestive segment	colon	2297
absorption segment	colon	2412
Immune segment	colon	3322
Digestive segment	pancrease	1174
absorption segment	pancrease	875
Immune segment	pancrease	947
Digestive segment	liver	811
absorption segment	liver	824
Immune segment	liver	851

## Sheet: Table S8
Marker genes in mouse large_intestine
Gene	Digestive segment	absorption segment	Immune segment
Atf3	4.38456	12.8075	34.2412
Rrm2	23.4237	17.4398	7.95686
Col1a1	24.5947	19.585	30.5627
Col2a1	24.5947	19.585	30.5627
Col9a1	24.5947	19.585	30.5627
Igfbp5	65.3047	39.286	86.466
Tenm4	2.22126	8.94532	15.1414
Mpped2	62.7814	57.8589	72.2576
Myl9	88.7975	106.903	107.739
Sfrp1	88.2179	81.1674	110.617
Jun	1661.25	1667.49	2882.71
Zeb2	8.14459	4.86491	7.92668
Dusp1	459.884	794.164	1623.61
Prox6	23.5618	23.7022	26.2538
Mylk	70.0589	42.8743	87.666
Epha4	29.3398	16.0844	29.5732
Flna	99.2158	73.9671	179.697
Psd	88.5589	68.6454	119.787
Itaa1	54.7404	51.7524	93.2424
Tubb4b	1292.61	917.644	2119.37
Myh11	64.2233	52.2179	73.8842
Nr4a1	112.022	184.116	323.238
Fos	585.1	1333.18	2708.08
Nbea	12.5661	14.9297	22.3586
Col4a1	25.2052	18.165	28.6214
Galnt12	4.29174	9.91942	10.4254
Slit2	17.1955	23.8149	27.3332
Emb	57.4715	68.8945	67.8679
Tspan8	319.886	353.821	523.046
Epha7	2.28969	1.53358	3.59223
Is|1	59.2174	50.2563	64.7742
Klf4	11.193	7.13941	43.2146
Pgk1	39.1362	38.4435	44.1964
Smc4	7.72178	6.0755	7.31985
Map4k4	8.4823	11.4171	23.5858
Gata2	2.89529	2.79906	6.11631
Col1a2	2.69438	2.74252	3.40343
Masp1	150.74	121.311	268.315
Sparc	27.8335	44.1303	100.975
Sox11	55.7103	50.6504	124.607
Tagln	85.181	141.006	173.832
Foxp1	70.8969	30.8936	86.0284
Pcolce	2.26285	2.52788	6.83209
Pla2g7	6.58169	8.61287	12.9651
Semafa	5.76384	10.4821	28.9634
Cone8	57.8861	232.145	320.503
Galnt12	50.8398	36.0711	79.2221
Tmtc2	2.92144	6.39713	14.3332
Nfix	13.5325	10.1628	15.8872
Smoc2	42.7735	80.3523	188.487
Tcf4	22.6433	23.7373	42.1634
Isoc1	15.0392	16.661	16.4125

## Sheet: Table S9
Marker genes in mouse small_intestine
Gene	Digestive segment	absorption segment	Immune segment
Ctsl	55.7961	168.765	38.8431
Aldh1a2	85.181	141.006	173.832
Ldhb	295.836	136.574	71.6956
Fabp7	314.568	475.668	45.1924
Pkm	328.961	186.026	69.6557
Dstn	331.204	362.688	330.165
Ccnb2	490.538	227.894	41.5209
Fabp2	544.415	963.174	390.735
Eno1	563.332	345.484	100.541
Prdx6	615.933	473.779	378.674
Fabp1	737.417	1063	323.702
Dynll1	758.93	211.755	2.56088
Cdk1	196.705	83.3568	19.6356
Tyms	171.621	92.5392	25.0202
Fermt2	153.65	84.2352	116.232
H2afz	1508.91	718.743	234.02
Mylk	70.0589	42.8743	87.666
Gpc6	67.1144	45.2367	49.2155
Igfbp5	65.3047	39.286	86.466
Myh11	64.2233	52.2179	73.8842
Cdc20	59.8634	28.3601	6.92688
Gapdh	2529.52	1042.29	621.233
Ckb	4918.2	2242.61	245.71
Tpx2	46.6876	26.5534	2.48499
Shh	44.3614	28.0707	35.4791
Aldh1a1	42.0202	72.9733	104.083
Sord	36.3714	28.1702	23.555
Top2a	35.5339	26.1698	6.44286
Pde5a	29.9083	20.3365	36.1783
Ung	29.4411	28.8801	15.0687
Fbln1	25.7849	17.4113	29.7289
Col4a1	25.2052	18.165	28.6214
Col1a1	24.5947	19.585	30.5627
Zeb2	8.14459	4.86491	7.92668
Bmp3	7.76621	2.41661	2.61298
Mfge8	5.86839	19.0378	6.21434
Oat	4.53975	3.41096	4.64174

## Sheet: Table S10
Marker genes in mouse pancreas
gene	Digestive segment	absorption segment	Immune segment
Rpl27	11227.7	5971.72	4881.12
RPLP1	7975.22	5028.99	2988.81
Rps14	7399.4	3150.39	2452.23
ATP5G2	7286.77	2427.51	1475.76
Rpl15	6261.04	2914.62	2621.24
Rpl19	5863.36	2889.25	2025.96
Rpl23	5800.87	3571.43	2454.34
Rps6	5793.64	2214.65	1696.57
Rpl30	5789.67	2831.4	2600.01
Rpl23a	5783.65	2537.24	2269.54
RpL10	5676.86	3313.17	2937.96
Rpl27a	5568.72	2602.44	2757.5
rps15	5121.18	2056.82	1980.29
rps3	4516.68	2114.95	1840.44
Rps7	4390.53	2437.75	1928.29
rpl11	4092.07	2037.81	1627.54
Rps27	3823.88	2061.47	1831.59
rpl10a	3804.08	2173.79	1719.27
RPS23	3656.59	2351.78	1681.11
rpl-7	3087.17	1433.57	1327.66
hspa8	2608.35	1869.18	2059.35
ATP5B	2548.53	1144.27	473.924
GAPDH	2529.52	1042.29	621.233
Slc25a3	2254.42	951.702	185.662
Cox5a	2148.11	913.572	477.239
Ybx1	2121.72	938.227	514.059
H2AFZ	1508.91	718.743	234.02
CYCS	1378.13	865.617	172.59
GLUL	1309.15	636.437	363.806
tpt1	1300.16	924.733	786.475
ATP5A1	1223.46	600.018	213.731
Rpl28	1175.27	1084.97	665.381
Cd9	1093.3	411.01	223.63
Rpl39	1084.51	565.09	363.179
RPL18A	1080.68	524.261	449.679
XBP1	1041.88	787.691	707.695
ATP5C1	977.558	460.89	152.955
rpl22	899.304	868.194	449.922
vdac2	858.49	429.278	114.577
TIMP3	813.073	212.261	184.091
Dynll1	758.93	211.755	2.56088
Hmgb1	741.823	388.928	112.059
Atp5f1	738.359	396.03	150.177
GHITM	718.934	364.101	106.986
Uqcrq	709.911	351.714	91.7961
PRDX6	615.933	473.779	378.674
YWHAE	615.055	492.59	403.413
NDUFA12	588.621	259.26	147.457
Atp5j	576.311	368.983	138.227
CCT5	565.089	276.921	201.998
ENO1	563.332	345.484	100.541
Rpl29	550.827	488.963	284.165
Atp5h	491.843	393.476	127.383
Skp1	446.275	275.804	132.979
RPL36	434.878	220.851	166.665
pdi-2	433.17	318.785	356.09
TCEB2	406.661	190.487	107.967
Dynlt1	405.023	185.834	88.0083
SUCLG1	402.02	198.224	99.3664
Psmc5	368.704	152.298	89.5436
TMED9	358.864	262.558	212.799
NDUFB8	357.403	179.504	112.58
PDIA3	344.082	311.514	301.313
pkm	328.961	186.026	69.6557
Snrpd2	323.881	139.018	135.683
Tmem258	320.006	271.588	241.746
HADHB	312.757	169.97	61.7844
HSPA5	298.162	195.268	180.888
ldhbb	295.836	136.574	71.6956
fkbp1a	290.539	137.154	144.609
dad1	288.349	233.677	199.546
Tceb1	281.312	131.328	119.165
snrpe	264.692	184.543	110.765
Pomp	264.59	135.57	69.3724
ostc	259.533	265.05	218.265
vcp	257.089	166.577	150.352
Ssr4	256.704	227.138	145.691
Srsf3	250.831	228.575	201.009
EIF3F	241.601	137.877	82.1772
PSMC6	240.114	132.078	59.3158
Psma1	238.934	122.561	85.5658
PSMB5	233.04	125.53	76.7968
SNRPB	228.385	94.868	126.375
Hint1	226.848	126.701	106.508
SEC11C	218.519	107.118	101.851
MPC2	215.829	97.8251	32.4115
DNAJA1	211.832	113.972	72.2067
Nid1	207.528	50.9778	46.7605
NDUFB5	195.226	73.5056	44.5976
Rpn1	187.375	152.198	96.3956
ctsd	187.268	1.11028	1.96415
ORMDL1	180.616	109.365	100.351
Cd63	180.469	71.8894	0.710831
CYB5A	180.011	199.007	130.889
EIF4A3	174.355	103.06	73.7259
rbx1	169.262	76.2683	84.4088
NDUFB3	167.097	43.7204	29.3399
sumo2	162.288	112.773	71.2905
Polr2l	156.271	131.505	93.6666
Klf10	152.465	86.5535	93.8723
SOD2	151.673	102.691	75.4742
Lsm3	151.274	72.4226	78.379
Psmc3	149.969	68.7658	42.6685
Cpa1	144.269	0.90868	2.0408
gtf2a2	137.75	63.0666	68.9408
PSMB6	133.269	84.08	37.3749
WDR83OS	131.168	82.8679	74.936
TSPAN7	127.995	79.8834	63.1069
SERINC1	121.501	54.2655	75.2018
CCT7	121.278	80.1834	66.9561
ARF4	121.119	80.2578	91.5664
psma7	119.373	60.4906	30.2537
DCDC2	117.725	76.4289	26.2664
Emc10	111.429	69.2655	50.0159
Npc2	110.716	108.711	29.5745
Srsf7	110.563	116.364	103.509
STOM	110.484	52.1132	0.470996
Pabpc1	110.275	75.1269	40.2425
HM13	106.85	82.1877	88.5128
Qdpr	104.009	91.6557	67.6675
nap1l1	103.179	65.3446	22.1731
Ndufa2	98.6218	38.7765	18.8313
14-3-3zeta	97.6626	60.4841	63.9227
EIF2S2	94.7892	54.0826	31.7879
EIF1AX	92.4055	57.3354	43.9957
PDIA6	90.356	57.3542	52.5119
NDUFA5	83.7233	42.428	15.9491
ST13	81.3751	45.1525	18.7036
Acp1	81.1439	44.7615	48.5598
PSMC2	80.9675	53.2817	36.2299
naa20	78.5181	28.8346	22.9099
PGM1	74.6132	48.2536	13.8869
DPP4	73.886	83.6682	46.6542
ilf2	71.218	61.2744	42.9606
FKBP3	69.7506	54.9411	17.0767
Calu	69.1952	70.5938	47.732
Lamtor1	68.1979	52.3176	45.6444
Hadh	68.0227	50.1458	28.3688
STRAP	61.3131	55.4375	47.766
Esd	59.7946	51.6268	37.4221
Tmem230	58.1815	45.3783	38.0479
Polr2g	57.7375	42.5007	13.8291
TMEM167A	57.6396	36.4019	33.9843
slc38a2	56.6294	88.5761	52.5881
HNRNPDL	55.8659	37.8945	20.8244
CTSL	55.7961	168.765	38.8431
Prdx3	54.263	43.0475	38.0278
AOX1	48.5836	39.8435	28.7008
PRAF2	48.2412	36.8753	35.7619
Cnn3	47.7853	26.651	26.3915
PSMD4	47.3344	37.75	34.3314
VPS29	46.8782	41.9244	33.4514
LIPA	44.7476	47.8783	28.1111
PNLIP	44.4448	0.213095	0.66833
Hat1	43.8952	37.6812	17.7917
Tusc3	42.758	38.2248	30.0329
CNIH4	42.3179	34.3554	25.0878
HSPD1	36.8622	12.5104	9.81182
Psmd6	35.9686	27.2862	15.4919
Psma4	35.3745	23.4073	13.7688
nhp2	35.167	41.9734	23.3587
Txnl1	34.1279	22.1451	20.1553
SUPT4H1	33.045	14.3297	9.82018
LAMTOR5	32.8247	28.8088	19.9416
Ncoa7	32.1333	21.2409	24.8411
vmp1	32.0387	26.4329	23.442
CD53	31.9406	15.5876	11.0679
MIF	31.8279	18.9328	9.26349
Rabac1	30.5427	32.3313	30.8727
PPA1	30.3237	24.1675	15.7319
PLSCR1	29.6686	10.7891	5.43021
Fam96a	29.0822	33.4294	22.8295
park7	28.2577	17.613	14.5455
SPARCL1	27.7279	15.4036	19.5895
SF3B1	27.5012	14.6597	18.5149
Pts	26.0244	19.3258	19.1078
PPT1	24.7352	13.3023	15.9052
glrx3	24.4742	22.1269	15.4378
SUB1	24.3015	18.6076	6.32139
HSPG2	24.2995	12.1292	13.7469
GMFG	23.9877	26.9098	24.733
BNIP3	23.4081	29.3695	23.7201
Mrpl17	23.1766	18.9452	10.9446
FKBP5	22.9258	12.6409	10.313
Ubxn4	22.1984	16.9853	18.5049
DNAJC8	21.3549	14.2051	8.67218
Sap18	20.2297	8.31523	5.38107
EMC4	19.3367	10.6151	9.09032
Gmnn	19.3073	10.2609	0.606869
Dnajc12	18.2014	11.26	4.54611
GATM	17.925	19.8219	0.760105
psmg2	17.8322	15.3717	6.95591
Dync1i2	17.1913	13.7097	10.4027
METTL5	14.9405	11.3244	8.57276
Stoml2	14.772	12.7723	5.70167
slc39a14	14.6946	13.3191	11.1162
TSC22D1	13.8812	7.7945	7.58009
MPG	13.5699	17.7949	13.6756
apex1	13.1487	11.422	8.14175
ANPEP	11.0408	13.4727	10.1688
HNRNPK	10.9245	10.0702	6.96471
SURF4	8.98613	8.87625	8.88711
SAMHD1	8.53207	9.12518	7.58573
TDRD9	8.08784	7.18351	4.54255
CPB1	7.18195	0.15038	0.0654011
zcrb1	6.51262	7.72005	5.00887
Znhit1	6.27291	6.30721	5.04781
HTRA1	6.23246	6.45758	5.05509
MFGE8	5.86839	19.0378	6.21434
CAV1	5.5702	3.39295	3.01425
Sri	5.33983	4.76392	2.97945
GP2	5.02995	1.34392	0.799171
LRRC59	4.36857	5.19203	4.23128
ETS2	3.77765	2.28855	2.46591
PDCD5	3.28663	1.34579	0.577338
scgn	3.05775	4.59252	3.47467
VWF	2.56026	1.03906	0.220209
CTRB2	2.03723	1.41759	0.961744

[truncated: 2 more sheets: Table S11, Table S12]
